1 **Title**

2 **Integrated analysis sheds light on evolutionary trajectories of young**  
3 **transcription start sites in the human genome**

4

5 Cai Li<sup>1,#</sup>, Boris Lenhard<sup>2,3,4</sup>, Nicholas M. Luscombe<sup>1,5,6,#</sup>

6

7 <sup>1</sup> The Francis Crick Institute, 1 Midland Road, London, NW1 1AT, UK

8 <sup>2</sup> Computational Regulatory Genomics, MRC London Institute of Medical Sciences,  
9 Du Cane Road, London, W12 0NN, UK

10 <sup>3</sup> Institute of Clinical Sciences, Faculty of Medicine, Imperial College London, Du  
11 Cane Road, London, W12 0NN, UK

12 <sup>4</sup> Sars International Centre for Marine Molecular Biology, University of Bergen,  
13 Thormøhlensgate 55, N-5008 Bergen, Norway

14 <sup>5</sup> Okinawa Institute of Science & Technology Graduate University, Okinawa, 904-  
15 0495, Japan

16 <sup>6</sup> UCL Genetics Institute, University College London, Gower Street, London, WC1E  
17 6BT, UK

18 # Corresponding authors: [cai.li@crick.ac.uk](mailto:cai.li@crick.ac.uk) and [nicholas.luscombe@crick.ac.uk](mailto:nicholas.luscombe@crick.ac.uk)

19

20

21

## 22 **Abstract**

23 Previous studies revealed widespread transcription initiation and fast turnover of  
24 transcription start sites (TSSs) in mammalian genomes. Yet how new TSSs originate  
25 and how they evolve over time remain poorly understood. To address these questions,  
26 we analyzed ~200,000 human TSSs by integrating evolutionary and functional  
27 genomic data, particularly focusing on TSSs that emerged in the primate lineages. We  
28 found that intrinsic factors of repetitive sequences and their proximity to established  
29 regulatory modules (extrinsic factors) contribute significantly to origin of new TSSs.  
30 In early periods, young TSSs experience rapid sequence evolution driven by  
31 endogenous mutational mechanisms that reduce the instability of associated repetitive  
32 sequences. In later periods, the regulatory functions of young TSSs are gradually  
33 modified, and with evolutionary changes subject to temporal (fewer regulatory  
34 changes in younger TSSs) and spatial constraints (fewer regulatory changes in more  
35 isolated TSSs). These findings advance our understanding of how regulatory  
36 innovations arise in the genome throughout evolution and highlight the roles of  
37 repetitive sequences in these processes.

38

## 39 1. Introduction

40 Many studies revealed that transcription is pervasive in prokaryotic and eukaryotic  
41 genomes<sup>1,2</sup>. One recent study found that three-quarters of the human genome can be  
42 transcribed<sup>3</sup>, indicating a much more complex transcriptional landscape than  
43 previously thought. Transcription Start Sites (TSSs) are the genomic loci where  
44 transcription initiation occurs and thus are a critical class of regulatory element for  
45 transcriptional control. By harnessing diverse high-throughput sequencing  
46 technologies, studies in the past few years have greatly improved TSS annotation in  
47 model organism genomes, especially human, and uncovered new characteristics of  
48 transcriptional initiation<sup>4-6</sup>. One intriguing phenomenon about TSSs is that they occur  
49 widely throughout the genome, not only in typical promoters of annotated genes, but  
50 also in other regions such as intergenic or intronic loci. For example, some enhancers  
51 also contain TSSs, producing so-called enhancer RNAs<sup>7-9</sup>.

52 Many previous studies about TSS evolution focused on cross-species comparisons  
53 and revealed interesting macro-evolutionary patterns<sup>10-14</sup>. For example, by comparing  
54 human and mouse TSSs, a recent study found that >56% of protein-coding genes have  
55 experienced TSS turnover events since humans and mice diverged<sup>13</sup>. Genes with TSS  
56 turnover were also found to experience adaptive evolution in their coding regions and  
57 expression levels<sup>13</sup>. Unlike macro-evolution, however, micro-evolutionary processes  
58 (i.e. intra-species evolution) of TSSs are relatively poorly understood. Given the high  
59 turnover rate of TSSs<sup>13</sup>, population genomic data can provide a more detailed view of  
60 TSS evolution. Although some previous studies made use of population genomic data,  
61 they pooled all TSSs together to compare with non-TSS elements<sup>15</sup> or focused on  
62 purifying selection<sup>13,16</sup>. Since different TSSs could have distinct evolutionary histories,  
63 pooling all TSSs together could bury the interesting characteristics of a specific TSS  
64 categories. A recent comprehensive study in *Drosophila melanogaster* populations  
65 investigating the relationship between genetic variations and TSS usage identified  
66 thousands of genetic variants affecting transcript levels and promoter shapes,  
67 providing important new insights into TSS evolution at the population level<sup>17</sup>.

68 Despite extensive investigation, many questions about TSSs are yet to be addressed.  
69 Importantly, the evolutionary origin of new TSSs and evolutionary trajectories of  
70 newly emerged TSSs remain unresolved. Previous studies have suggested that

71 repetitive sequences are a rich source of new TSSs<sup>13,18</sup>, but the underlying  
72 mechanisms of how these sequences contribute to novel transcription initiation remain  
73 unclear. For instance, why do some repetitive elements initiate transcription and  
74 others not? How does the host genome handle the potential conflicts arising from the  
75 inherent instability of repetitive elements associated with new TSSs? Furthermore, the  
76 subsequent changes of newly emerged TSSs and their evolutionary fates have not  
77 been systematically investigated. Only by addressing these questions can we begin to  
78 understand how regulatory innovations arise in the genome throughout evolution and  
79 how they contribute to biological diversity and adaptation.

80 To gain detailed insights into evolution of young TSSs and the underlying regulatory  
81 mechanisms, we analyzed ~200,000 published human TSSs by integrating both  
82 evolutionary (inter-species and intra-species) and functional genomic approaches,  
83 with an emphasis on evolutionarily young TSSs that emerged in the primate lineages.  
84 We show that 1) intrinsic factors of repetitive sequences and extrinsic chromatin  
85 environments contribute significantly to the origin of novel transcription initiation; 2)  
86 after emerging in the genome, young TSSs undergo rapid sequence evolution which is  
87 likely due to several endogenous mutational mechanisms; and 3) regulatory outcomes  
88 of young TSSs are gradually modified in subsequent periods and tend to be subject to  
89 temporal and spatial constraints.

## 90 **2. Results**

### 91 **2.1 Identification of evolutionarily young TSSs in the human genome**

92 Using the cap analysis of gene expression (CAGE) sequencing technologies, the  
93 FANTOM 5 project<sup>4</sup> generated the most comprehensive TSS annotation to date,  
94 covering major primary cell types and tissues in human. To identify evolutionarily  
95 young TSSs, we took advantage of the ‘robust’ human TSS dataset from FANTOM  
96 project, which consists of 201,873 high-confidence TSSs. After filtering TSSs that  
97 could confound downstream analysis (see Methods for details), we grouped the  
98 remaining 151,902 TSSs into categories of different evolutionary ages. Since there is  
99 no large-scale CAGE TSS annotation in the other primate genomes, it is impossible to  
100 define the evolutionary ages of TSSs by comparing TSS annotations. However,  
101 previous studies revealed that sequence-intrinsic properties of many promoters can



102 drive transcription initiation autonomously<sup>19,20</sup>, indicating that the sequence itself is  
103 an important determinant of promoter capacity. Moreover, Young et al. (2015) found  
104 that, of those human TSSs that could be aligned to an orthologous sequence in the  
105 mouse, more than 80% have detectable transcriptional initiation in mouse<sup>13</sup>. This  
106 implies that if the orthologous sequence of a human TSS can be found in another  
107 genome, it probably exhibits initiation in that species.

108 Therefore, to estimate the evolutionary ages of human TSS loci, we investigated the  
109 sequence presence/absence patterns based on sequence alignments between human  
110 and other 16 genomes (10 primate species representing major primate lineages and 6  
111 non-primate mammalian species as outgroups). A human TSS locus is considered  
112 present in another genome if the corresponding pairwise alignment satisfies: 1) a  
113 mapping ratio of the human TSS peak (i.e. a CAGE tag cluster region predicted by  
114 decomposition-based peak identification method in FANTOM) in another genome of  
115  $\geq 90\%$  and 2) a mapping ratio of the TSS peak  $\pm 100$  bp (considered as core promoter  
116 region in this study) of  $\geq 50\%$  (see Methods and **Supplementary Tables 1-3** for more  
117 details). Based upon the presence/absence patterns in alignments, we categorized the  
118 human TSSs into four groups of different sequence ages (**Fig. 1a**): 1) TSSs whose  
119 sequence loci can be found in at least one non-primate mammalian genome,  
120 consisting of 141,117 TSSs (92.9% of all surveyed TSSs, named ‘mammalian’ group;  
121 **Fig. 1a**); 2) TSSs whose sequences occurred during early primate evolution but before  
122 the last common ancestor of Old World anthropoids, consisting of 6,668 TSSs (4.4%,  
123 named ‘primate’ group; **Fig. 1a**); 3) TSSs whose sequences occurred during the  
124 evolution of Old World anthropoids but before the last common ancestor of hominids,  
125 consisting of 3,318 TSSs (2.2%, named ‘OWA’ group; **Fig. 1a**); 4) TSSs whose  
126 sequences occurred since emergence of hominids, consisting of 799 TSSs (0.5%,  
127 named ‘hominid’ group; **Fig. 1a**). The relatively large numbers of TSSs in three recent  
128 periods corroborate the “frequent birth” phenomenon reported previously<sup>13</sup>, and  
129 enable us to perform detailed comparative analysis between these periods. Hereafter  
130 we considered TSSs in the ‘mammalian’ group as evolutionarily old TSSs and those  
131 in other three groups as evolutionarily young TSSs. For instance, in the gene *BAAT*  
132 locus shown in **Fig. 1b**, there are two old TSSs present in both primate and non-  
133 primate mammalian genomes, and one young TSS established during the evolution of  
134 OWAs. The young TSS is located in a region overlapping one long terminal repeat

135 (LTR) element (**Fig. 1b**), suggesting that it originated from an LTR insertion. This  
136 young TSS is expressed in many cell types where the old TSSs are expressed,  
137 suggesting it may undertake part of the transcription task of old TSSs or up-regulate  
138 the expression level of *BAAT* in some conditions.

139 We first examined some general features among TSS groups. We found that old TSSs  
140 are mainly associated with mRNAs (59%), while many young TSSs are associated  
141 with lncRNAs (54%~60%), indicating a compositional bias in the TSS groups (**Fig.**  
142 **1c**). As TSSs become older, the proportion of mRNA TSSs becomes larger, and the  
143 opposite happens to the intergenic lncRNA TSSs (**Fig. 1c**). Relative to older TSSs,  
144 younger TSSs generally have narrower TSS peaks (**Fig. 1d**) and comprise more  
145 TATA-box containing TSSs (**Fig. 1e**) and fewer CpG island (CGI)-associated TSSs  
146 (**Fig. 1f**). This is consistent with previous observations about broad and sharp  
147 promoters in mammalian genomes<sup>4,21</sup>, which found that CGI promoters are usually  
148 broad and associated with housekeeping genes, while TATA-box promoters are sharp  
149 and associated with less conserved tissue-specific genes. Both old and young TSSs  
150 exhibit elevated GC content and CpG content in TSS-proximal positions  
151 (**Supplementary Fig. 1**), although relative to young TSSs, old TSSs tend to be more  
152 GC-rich. We also noticed that the ‘hominid’ TSS group has higher average GC and  
153 CpG content relative to ‘OWA’ and ‘primate’ groups (**Supplementary Fig. 1**), which  
154 could be partly due to fewer historical deamination events of methylated cytosines in  
155 very young TSS loci (see also later sections about DNA methylation).

## 156 **2.2 Sources of young TSSs**

### 157 **2.2.1 Intrinsic factors of repetitive sequences contribute to novel transcription** 158 **initiation**

159 Based upon the defined TSSs groups of different ages, next we systematically  
160 investigated how new TSSs originate and how they evolve over time. Previous  
161 analyses from earlier FANTOM projects showed that many mammalian transcripts  
162 initiate within repetitive elements, especially retrotransposons<sup>13,18</sup>. Given the  
163 extensive retrotransposition during mammalian evolution, retrotransposon-derived  
164 TSSs could be an important source of novel TSSs. In addition, tandem repeats, which  
165 are highly mutable loci, were found to be abundant in promoter regions and have  
166 significant impact on gene expression<sup>22,23</sup>. With these observations in mind, we

167 examined the repetitive sequences (or ‘repeats’ for short hereafter) in all TSS loci,  
168 including transposable elements (TEs, i.e. retrotransposons and DNA transposons)  
169 and tandem repeats, based on annotations of RepeatMasker<sup>24</sup>, TRF<sup>25</sup> and STRcat<sup>26</sup>.  
170 We found that ~70% of young TSSs have at least one repeat element within core  
171 promoter regions ( $\pm 100$  bp of TSSs), but only 24% among old TSSs (**Fig. 2a**).  
172 Whereas a large fraction (43%) of repetitive sequences associated with old TSSs are  
173 tandem repeats, many young TSS loci are associated with retrotransposons, including  
174 LTRs, long intersperse nuclear elements (LINEs) and short interspersed nuclear  
175 elements (SINEs) (**Fig. 2a**). Because some tandem repeats could derive from  
176 retrotransposons, we performed an alternative analysis considering only the nearest  
177 retrotransposon element (**Supplementary Table 4 & Supplementary Fig. 2**). LTRs  
178 are the most abundant retrotransposon class associated with young TSSs, with ~30%  
179 of young TSSs are associated with LTRs. 14% and 8% of young TSSs are associated  
180 with LINEs and SINEs, respectively. The large number of retrotransposons associated  
181 with young TSSs suggests a major role of retrotransposition in forming new TSS loci.

182 Faulkner et al. (2009) revealed that many TE-derived TSSs are unevenly distributed  
183 along TE element consensus sequences, and many TE-derived TSSs are not present in  
184 the canonical 5’ promoters of TE elements<sup>18</sup>. However, how these TE-derived  
185 sequences contribute to transcription initiation was not discussed in detail and thus  
186 remain poorly understood. To gain more detailed insight into this question, we first  
187 mapped TSSs to the TE consensus sequences like Faulkner et al. (2009), and analyzed  
188 the distributions of TSSs along repeat elements. The distributions obtained from our  
189 analysis are similar to those in Faulkner et al. (2009), but also exhibit some  
190 differences. The differences are likely due to the upgraded CAGE protocols<sup>27</sup> and  
191 improvements in the TSS calling method<sup>28</sup>, which largely overcame some previous  
192 issues such as ‘multimapping’ and ‘exon painting’ in early CAGE datasets used in  
193 Faulkner et al. (2009).

194 We found that the TSSs associated with LTR elements are mainly in the sense strand  
195 of LTRs and clustered within narrow regions (**Fig. 2b** for the THE1B subfamily and  
196 **Supplementary Fig. 3** for more subfamilies). Since LTR elements contain the  
197 promoters for endogenous retroviral elements (ERVs), the sense-biased distributions  
198 of TSSs suggest that transcription initiation events in these regions are mainly  
199 contributed by the original ERV promoter activities within LTRs. These patterns were

200 not observed in Faulkner et al. (2009), as they only investigated the distributions of  
201 TSSs along LTR superfamilies but not the subfamilies. We also found that a large  
202 fraction (~50%) of young TSSs associated with LTRs contain a TATA-box motif  
203 starting at 25~35 bp upstream of the dominant TSSs (**Supplementary Fig. 4**),  
204 whereas the ratio drops to ~30% for the old TSSs associated with LTRs, suggesting a  
205 substantial fraction of TATA-box promoters derived from LTRs might have turned  
206 into TATA-less promoters during evolution.

207 LINE-1(L1) is the most abundant LINE family in the human genome (covering ~20%  
208 of human genome). The overall distribution of TSSs along L1 elements (**Fig. 2c**) is  
209 similar to that in Faulkner et al. (2009). However, we further observed many  
210 differences in the TSS distributions between different L1 subfamilies  
211 (**Supplementary Fig. 5**). For some subfamilies, transcription initiation occurs mainly  
212 at the region of 5'end antisense promoters (e.g. L1PB1, L1PBa1) which were  
213 discussed in Faulkner et al. (2009), whereas for other subfamilies the initiation occurs  
214 mainly at the 3'end (e.g. L1MB7) or rather randomly (e.g. L1M4). Although the  
215 background distribution of L1 subfamilies in the human genome can explain such  
216 difference to some degree, it is apparently not the only reason (**Supplementary Fig.**  
217 **5**). This suggests that sequences from different L1 subfamilies have very variable  
218 propensity to drive transcription initiation.

219 Alu elements comprise the most abundant SINE family in the human genome  
220 (covering ~10% of human genome). Although Alus are frequently inserted in  
221 promoter-proximal and intronic regions, previous research found that they generally  
222 lack capacity for driving autonomous transcription<sup>20</sup>. In the FANTOM5 dataset,  
223 initially we observed many new TSSs located around the 3' poly(A) region and the A-  
224 rich linker region, but later we found that these TSSs probably resulted from the  
225 technical artifacts in the CAGE sequencing in FANTOM5 and thus filtered out the  
226 related TSSs (**Supplementary Fig. 6**, see Methods for more details). The remaining  
227 Alu-associated TSSs tend to be enriched at the 5'end of Alu in the antisense strand  
228 (**Supplementary Fig. 6**), but how these sequences help drive transcription initiation is  
229 unclear.

230 We found that ~9% of young TSSs contain tandem repeats which are not associated  
231 with TEs. Unlike the tandem repeats derived from new TE insertions, the flank

232 regions of these tandem repeats tend to be conserved among mammals and have  
233 higher GC content (**Supplementary Fig. 7**), suggesting that some new TSSs in these  
234 regions are likely due to autonomous expansions of tandem repeats located in  
235 proximal regions of pre-existing promoters (some examples provided in  
236 **Supplementary Fig. 7**). This is consistent with previously reported enrichment of  
237 tandem repeats in primate promoters<sup>13,22,29,30</sup>.

238 Taken together, these findings suggest that repetitive sequences significantly  
239 contribute to novel TSSs in multiple ways. Among the repetitive sequences,  
240 retrotransposons (especially LTRs) are the biggest contributor for generating new  
241 TSSs.

### 242 **2.2.2 Extrinsic factors contribute to novel transcription initiation**

243 Although previous studies and our analyses indicate that some sequence-intrinsic  
244 features of repeats can promote transcription initiation, the majority of repeats  
245 harboring such proto-TSS sequences do not exhibit initiation signals. For instance,  
246 fewer than 1% of LTR elements in the human genome are associated with CAGE-  
247 defined TSSs, implying that there are extrinsic factors that could affect the  
248 transcription initiation in these regions. One reason for this is that most repeat  
249 elements tend to be highly suppressed by the host defense mechanisms, such as DNA  
250 methylation and methylation of H3 lysine 9<sup>31</sup>. In addition, we reasoned that proximity  
251 of some proto-TSSs to established transcription units might be an extrinsic factor for  
252 promoting novel transcription initiation, because such proximity could allow them to  
253 access the transcription machinery of other TSSs for initiation. To test this hypothesis,  
254 we first examined the *cis*-proximity of the LTR proto-TSSs to old TSSs. Indeed, we  
255 found that young TSS-associated LTRs are closer to old TSSs compared to other  
256 LTRs that are not associated with TSSs and random genomic intervals (**Fig. 2d**). We  
257 further took advantage of published ChIA-PET data which identifies spatially  
258 proximal regulatory regions in the genome. We focused on the ChIA-PET data for  
259 CTCF and RAD21 (a subunit of cohesin), which are important for chromatin  
260 architecture and linking regulatory modules for transcriptional regulation<sup>32</sup>. CTCF  
261 binding sites were also found to be highly conserved during evolution<sup>32</sup>. We examined  
262 the distances of LTRs to the mammalian-conserved ChIA-PET interaction loci (see  
263 Methods) and found that TSS-associated LTRs are closer to CTCF or RAD21

264 interaction loci compared to non-TSS-associated LTRs (**Fig. 2e**). We suggest that  
265 proximity to CTCF/cohesin anchoring loci may enable some proto-TSSs to be  
266 spatially proximal to other transcription units and utilize their transcription machinery  
267 for initiation.

268 The spatial proximity of young TSSs to old TSSs may also help to explain the  
269 evolution of the number of TSSs per gene. We noticed that the number of TSSs per  
270 gene in the human genome approximates to an exponential distribution – the number  
271 of genes with a specific number of TSSs decreases exponentially with increase of the  
272 number of TSSs per gene (**Fig. 2f**). The exponential relationship appears to be  
273 independent of gene lengths, because it still exists when looking at genes within a  
274 specific length range (**Supplementary Fig. 8**). The exponential distribution indicates  
275 that most genes have few TSSs, whereas a small fraction of genes have large number  
276 of TSSs. A similar relationship is also seen for newly emerged TSSs (**Fig. 2g**), which  
277 implies that a small fraction of genes gain many new TSSs during a specific period.  
278 We also observed a positive correlation between number of pre-existing TSSs per  
279 gene and number of newly gained TSSs per gene (Pearson's  $r=0.24$ ,  $p < 2.2e-16$ ,  
280 **Supplementary Fig. 9**) - genes that have more existing TSSs are more likely to gain  
281 new TSSs in a later period. Based upon the above observations, we suggest that most  
282 of new TSSs derived from repeats arise opportunistically, partly due to their sequence-  
283 intrinsic properties and proximity to other transcription units. As time goes by, some  
284 newly emerged TSSs could be exapted by proximal genes to form alternative  
285 promoters. On the other hand, these observations also suggest that the existing  
286 transcriptional landscape to some extent constrains the emergence and evolution of  
287 new TSSs.

## 288 **2.3 Rapid sequence evolution of young TSSs**

### 289 **2.3.1 Young TSSs undergo rapid sequence evolution**

290 Next we investigated the subsequent changes of young TSSs after they appear in the  
291 genome. One important aspect is the evolutionary rate, which reflects the general  
292 trend of sequence evolution. A previous study based on TSSs of early FANTOM  
293 projects<sup>14</sup> showed that evolutionary rates in promoter regions vary between lineages  
294 and that the primate lineages appear to have increased rates in promoter regions;  
295 however evolutionarily young and old promoters were not separately analyzed. Here



296 we focused on the evolutionary rates for TSS groups of different ages in comparison  
297 with the genomic background. To do this, we utilized genomic alignments to infer  
298 evolutionary sequence changes around TSS loci for two recent periods (from the last  
299 common ancestor of OWAs to the last common ancestor of hominids and from the last  
300 common ancestor of hominids to present, as indicated by the phylogeny in **Fig. 3a**),  
301 using a maximum likelihood method (see Methods). Based on inferred sequence  
302 changes, we calculated the relative rates of substitutions and small insertions/deletions,  
303 which were normalized by genomic average. We found that proximal positions of old  
304 TSSs have lower substitution rates compared with surrounding regions and genomic  
305 average (**Fig. 3a**), suggesting that they were subject to purifying selection in these  
306 periods. In contrast, proximal positions of young TSSs exhibit elevated evolutionary  
307 rates compared to the surrounding regions as well as genomic average (**Fig. 3a**),  
308 suggesting that young TSS loci underwent rapid sequence evolution. Interestingly, for  
309 the ‘primate’ TSS group the substitution rates during the early period are higher than  
310 in the later period (**Fig. 3a**), suggesting that newly emerged TSSs evolve rapidly at  
311 first and then slow down later. Although this pattern is not observed in the  
312 insertion/deletion rates (**Supplementary Fig. 10**), it might be due to saturated  
313 insertion/deletion mutations and some ancestral insertion/deletion events not being  
314 accurately inferred using alignments of extant species. Additionally, by examining the  
315 population polymorphism data from the 1000 genomes project, we found that the  
316 young TSSs also have elevated variant densities relative to surrounding regions  
317 (**Supplementary Fig. 11**), further supporting that young TSSs undergo rapid  
318 sequence evolution.

### 319 **2.3.2 Endogenous mutational processes contribute to rapid evolution of young** 320 **TSSs**

321 We then asked how the young TSSs evolve rapidly after appearing in the genome.  
322 Since many young TSSs are associated with repetitive sequences, we reasoned that  
323 some mutational processes associated with repeats could contribute to the rapid  
324 evolution.

325 One contributing factor could be DNA methylation, which is one of main mechanisms  
326 for repressing TE activities<sup>31</sup>. We found that the younger TSSs have significantly  
327 higher levels of CpG methylation in the germline compared to older TSSs (**Fig. 3b**

328 and **Supplementary Fig. 12**). In addition, TE-associated TSSs tend to have higher  
329 levels of CpG methylation compared to non-TE TSSs within each TSS group (**Fig.**  
330 **3b**). Because methylated cytosine (mC) can frequently mutate to thymine (T) via  
331 deamination, the DNA hypermethylation around young TSSs in the germline  
332 represents an important contributor for the elevated evolutionary rates. This is further  
333 supported by the substitution patterns in the human population genomic data, in which  
334 the C > T is the most common substitution type (~40% of all substitutions) in all TSS  
335 groups and ~17% of C to T mutations occur in the CpG context (**Fig. 3c**).

336 Another contributing factor is recombination, which has been found to be associated  
337 with mutations and GC-biased gene conversion<sup>33</sup>. We found that LTR-associated TSSs  
338 have significantly higher recombination rates relative to genomic average (**Fig. 3d**).  
339 Higher recombination rates are also observed in non-TE-associated young TSSs (**Fig.**  
340 **3d**). Consistently, older LTR-associated TSSs have more solitary LTRs (**Fig. 3e**),  
341 which are known to result from allelic or non-allelic homologous recombination<sup>34</sup>. As  
342 recombination hotspots evolve rapidly<sup>35</sup> and ancient recombination events are  
343 difficult to detect, it is possible that recombination had also contributed to the rapid  
344 evolution of SINE/LINE-associated TSSs.

345 A third contributing factor is the instability of tandem repeats. Previous research  
346 revealed that the mutability of microsatellites (also known as short tandem repeats)  
347 increases with their length and long microsatellites tend to be shortened or interrupted  
348 by mutations over time<sup>36,37</sup>. Indeed, we found that tandem repeats associated with  
349 younger TSSs tend to be shorter than those in older TSSs (**Fig. 3f**), implying that they  
350 are more likely to mutate.

### 351 **2.3.3 Consequences of rapid evolution in young TSSs**

352 A direct consequence of the rapid evolution around young TSSs is that they  
353 accumulated many changes, which could reduce or eliminate the transposition  
354 capacity of TEs or the mutability of tandem repeats around TSSs, resulting in a more  
355 stable genomic environment. Therefore these mutational processes probably help to  
356 resolve the genomic conflicts caused by the inherent instability of associated repeats  
357 around young TSSs. In addition, we suspect that rapid evolution may lead to deaths of  
358 some young TSSs, because some sequence changes could disrupt critical promoter  
359 components required for transcription initiation. In the example shown in **Fig. 3g**, a



360 LTR locus with transcription initiation signal in human has been deleted from rhesus  
361 and baboon. However, because we lack large-scale CAGE-defined TSSs in other  
362 primate species and there could be polymorphisms in TSS loci, we are currently  
363 unable to perform detailed analysis regarding the evolutionary deaths of young TSSs.

## 364 **2.4 Functional impact of young TSSs**

### 365 **2.4.1 TSSs of different evolutionary ages exhibit distinct functional signatures**

366 Previous comparison between human and mouse CAGE-defined TSSs revealed that  
367 lineage-specific TSSs tend to have tissue-restricted expression profiles, often in  
368 samples associated with testis, immunity or brain<sup>13</sup>. Yet how the regulatory functions  
369 of these lineage-specific TSSs are gradually established in organisms remain unclear.  
370 We sought to investigate the resulting regulatory impact of newly emerged TSSs and  
371 how their impact changes over time. We first took advantage of published functional  
372 genomic data from ENCODE and other projects to compare related functional  
373 signatures between TSS groups, including DNase I hypersensitivity (DHS), histone  
374 modifications, DNA methylation, transcription factor (TF) binding and chromatin  
375 interactions. Intriguingly, we found that TSSs of different ages exhibit segregating  
376 functional signatures (**Fig. 4** for GM12878 cell line) and such patterns are observed in  
377 different cell lines (**Supplementary Fig. 13** for K562 and H1-hESC cell lines).  
378 Relative to older TSSs, younger TSSs tend to have lower chromatin accessibility  
379 (DHS, **Fig. 4a**), lower levels of activating histone modifications (e.g. H3K4me3,  
380 H3K27ac, H3K4me1, H3k9ac, **Fig. 4b** and **Supplementary Fig. 14**) and higher CpG  
381 methylation (**Fig. 4c**), suggesting younger TSSs are under a more repressed chromatin  
382 environment. By examining ChIP-seq data for TFs in ENCODE cell lines, we found  
383 that older TSS loci tend to have more binding regions (i.e. more surrounding  
384 sequences overlapping ChIP-seq peaks) relative to younger TSSs (**Fig. 4d**, and  
385 **Supplementary Fig. 15** for meta-profiles of individual TF ChIP-seq datasets in  
386 GM12878). We also observed a similar trend for computationally predicted TFBSs  
387 (**Supplementary Fig. 16**). We further analyzed the published ChIA-PET interaction  
388 data for RNA polymerase II (RNAP II), which are usually formed within  
389 CTCF/cohesin looped structures and considered to reflect promoter-enhancer  
390 interactions<sup>38</sup>. We found that younger TSSs have fewer RNAP II chromatin  
391 interactions compared with older TSS (**Fig. 4e**), suggesting that younger TSSs tend to

392 lack connections to other regulatory modules. This is consistent with the observations  
393 in TF binding (**Fig. 4d**), as TF binding is important for forming promoter-enhancer  
394 interactions. As for expression output, younger TSSs tend to display lower expression  
395 than older TSSs (**Fig. 4f**), which is consistent with a previous observation that  
396 evolutionarily volatile promoters tend to have lower expression levels<sup>13</sup>. Taken  
397 together, these observations indicate that the evolution of TSSs leave footprints in the  
398 functional signatures of TSSs; namely that younger TSSs tend to have smaller  
399 regulatory impact on a genome and that the impact increases with time.

400 By comparing the TSS subgroups defined by the transcript types, we also observed  
401 heterogeneity of functional signatures within TSS groups. Within a similarly-aged  
402 group, TSSs associated with mRNAs tend to have higher DHS, more activating  
403 histone modifications, more TF binding and more chromatin interactions than other  
404 TSSs (**Fig. 4h-m** and **Supplementary Fig. 17**), indicating they are more  
405 transcriptionally active. Consistently, mRNA TSSs tend to have higher expression  
406 levels than other TSSs within the same group (**Fig. 4n**). Furthermore, TSSs of  
407 proximal lncRNAs appear to be more transcriptionally active compared to that of  
408 intergenic lncRNAs, likely because they are more proximal to other transcription units.  
409 Overall, these findings suggest that locations of young TSSs in gene annotation  
410 context could influence the regulatory outcomes.

#### 411 **2.4.2 Evolution of regulatory functions of young TSSs appears to be subject to** 412 **temporal and spatial constraints**

413 The segregating functional signatures of TSSs of different ages strongly imply that the  
414 regulatory outcomes of young TSSs are gradually changed over time. Yet it remains  
415 unclear how regulatory changes of young TSSs take place in organisms during  
416 evolution, e.g. in what tempo and mode. The regulatory impacts of historical and  
417 fixed sequence changes around TSSs are difficult to assess, however, there are many  
418 ongoing changes around TSSs within human populations, whose regulatory effects  
419 have been widely studied by combining functional and population genomic  
420 approaches<sup>39</sup>. Two common strategies are to identify regulatory quantitative trait loci  
421 (rQTLs, e.g. TF binding QTLs, histone modification QTLs and DHS QTLs) and  
422 variants associated with regulatory allelic specificities (AS, e.g. allele-specific TF  
423 binding, allele-specific methylation). Although no QTL or AS study has been

424 specifically performed for human CAGE-defined TSSs, we can apply data from  
425 genome-wide rQTL and AS studies of other molecular traits. A previous study<sup>40</sup>  
426 revealed that expression levels of CAGE-defined TSSs are highly correlated with  
427 other functional signatures such as TF binding, histone modifications and DHS in  
428 surrounding regions, and can be largely predicted by those functional signatures ( $R^2 >$   
429 0.7). Therefore we reasoned that changes in the regulatory outcomes of TSSs can be  
430 approximated by changes in related functional signatures in surrounding regions. By  
431 examining rQTLs and AS variants (together called regulatory variants) in TSS loci of  
432 different ages, we can gain insights into the tempo and mode of regulatory evolution  
433 of TSSs at different life stages.

434 In our analysis we focused only on the *cis*-regulatory variants around TSS loci, as  
435 published *trans*-regulatory variants are rare and of relatively low-quality. Previous  
436 expression QTL studies found that the density of *cis*-regulatory variants drops rapidly  
437 with increased distances to target TSSs<sup>41</sup>, we restricted our analysis to only regulatory  
438 variants within  $\pm 1$  kb of TSSs. By re-analyzing data from multiple independent  
439 studies, including DHS, methylation, histone marks and TF binding, we found that  
440 younger TSSs tend to have fewer regulatory variants compared with older TSSs (see  
441 **Fig. 5a-d** for four representative datasets and **Supplementary Fig. 18** for more  
442 datasets). The trend is especially clear for variants associated with DHS, methylation  
443 and TF binding. This is interesting because it suggests that although young TSS loci  
444 evolve rapidly, many of the sequence changes appear to have none or limited impact  
445 on transcriptional regulation. Since some TSSs are closely spaced, regulatory variants  
446 could be counted multiple times in the above analysis (though it may be possible for a  
447 variant to affect multiple adjacent TSSs). We still observed similar patterns even after  
448 excluding all the TSSs separated by less than 2 kb (**Supplementary Fig. 19**).  
449 Moreover, similar trends are observed when only including regulatory variants with  
450 high derived allele frequencies (**Supplementary Fig. 20**), changes in which are more  
451 likely to be fixed in populations in the future. Overall, these observations imply that  
452 regulatory evolution of young TSSs is subject to a temporal constraint - younger TSSs  
453 have a slower tempo in regulatory evolution (**Fig. 5e**), which might be due to the  
454 strong repression in early periods.

455 Separating similarly aged TSSs according to transcript type, mRNA and proximal  
456 lncRNA TSSs tend to have more regulatory variants compared with intergenic

457 lncRNA TSSs (**Fig. 5a-d**). Since mRNA and proximal lncRNA TSSs also have more  
458 ChIA-PET interactions than other TSSs (**Fig. 4l**), we propose that there is a spatial  
459 constraint on the regulatory evolution of young TSSs. Generally, younger TSSs have  
460 less connectivity to other regulatory modules (i.e. spatially isolated) than older TSSs  
461 (**Fig. 4e**), which likely limits their functional impact. In the subsequent evolution,  
462 sequence changes in the young TSSs which are proximal to other regulatory modules  
463 tend to have more regulatory effects and these TSSs may be incorporated in the  
464 existing regulatory network more quickly (i.e. a higher tempo of regulatory evolution  
465 in these TSSs). In contrast, relatively isolated TSSs tend to have a slower tempo of  
466 regulatory evolution and are more difficult to be co-opted by the host.

467 Examples of evolving *cis*-proximal and *trans*-proximal young TSSs are shown in **Fig.**  
468 **5f-g**. In the gene *RNFT2* locus shown in **Fig. 5f**, an ‘OWA’ TSS, which lies on the  
469 antisense strand of a newly inserted L1 element, is *cis*-proximal to an upstream old  
470 TSS. In the surrounding regions of the ‘OWA’ TSS, there are multiple polymorphic  
471 sites in current populations, two of which are regulatory variants affecting PU.1  
472 binding and H3K4me3 respectively (**Fig. 5f**). In the example shown in **Fig. 5g**, a  
473 ‘primate’ TSS within an LTR element is ~70 kb away from *TAGAP* locus. However,  
474 this young TSS is *trans*-proximal to the TSSs of *TAGAP*, as supported by several  
475 CTCF and RNAPII ChIA-PET interaction pairs (**Fig. 5g**). This LTR is a solitary LTR  
476 and thus lack capacity for retrotransposition. Six regulatory variants are within  $\pm 1$  kb  
477 of the young TSS (**Fig. 5g**). More examples are given in **Supplementary Fig. 21**.

### 478 **3 Discussion**

479 Given the large number of identified TSSs in the mammalian genomes and the high  
480 TSS turnover rate, it is important to understand where the new TSSs come from, how  
481 they evolve over time, and their functional impact on transcripts. By performing  
482 evolutionary and functional analyses, we gain several important insights into the  
483 evolution of newly emerged TSSs. We summarize our main findings in an integrative  
484 model as shown in **Fig. 6**.

485 First, our analyses revealed several sequence-intrinsic and extrinsic factors that  
486 promote the emergence of new TSSs (**Fig. 6**). Intrinsic factors are mainly associated  
487 with the expansion of repetitive sequences, among which retrotransposons represent a  
488 major source of new TSSs. In addition to sequence-intrinsic properties, chromatin

489 organization and spatial chromosomal interactions are likely important extrinsic  
490 factors. New TSSs are usually proximal in *cis* or *trans* to other established  
491 transcriptional units providing easier access to the transcriptional machinery, whereas  
492 unexpressed proto-TSSs are more isolated. This dependence on extrinsic chromatin  
493 environment partly explains why only a small fraction of proto-TSSs have detectable  
494 initiation signals.

495 Secondly, resolving genomic conflicts is likely the main theme in the early period of  
496 young TSSs (**Fig. 6**). Our evolutionary rate analysis revealed that young TSSs  
497 experienced rapid sequence evolution in early periods, which appear to be associated  
498 with several endogenous mutational processes, including DNA methylation,  
499 recombination and tandem repeat mutagenesis. We suggest that such rapid evolution  
500 can reduce the genomic conflicts caused by the instability of repetitive sequences  
501 associated with young TSSs, as the TSS loci became more stable after they mutated.  
502 We suspect that a considerable fraction of new TSSs may die during the rapid  
503 evolution in early periods, as sequence changes could disrupt critical promoter  
504 components required for transcription initiation.

505 Thirdly, by analyzing functional genomic data, we found that in early periods young  
506 TSSs tend to have limited transcriptional competency, likely due to the highly  
507 repressive environment and lack of connectivity to other functional modules.  
508 However, their regulatory potential appear to be gradually enhanced over time (**Fig.**  
509 **6**). Interestingly, by examining regulatory variants around TSS loci, we revealed that  
510 the evolution of regulatory functions of young TSSs appears to be subject to temporal  
511 and spatial constraints. The temporal constraint - that younger TSSs have fewer  
512 regulatory variants within a period (slower tempo) despite faster sequence evolution -  
513 is probably due to the genomic conflicts caused by the novel transcription and  
514 associated unstable repetitive sequences. Young TSSs tend to be strongly repressed at  
515 first and require time to resolve the genomic conflicts caused by associated repeats.  
516 The spatial constraint – that TSSs with fewer chromosomal contact display a slower  
517 tempo of regulatory evolution - likely limits the regulatory impact of young TSSs in  
518 early stages and affects the evolutionary trajectories of young TSSs depending on  
519 their genomic context. Based upon these observations and proposed constraints, we  
520 speculate that younger and (or) more isolated TSSs are more likely to die out during  
521 evolution.

522 Many studies have reported the contribution of repetitive sequences to regulatory  
523 innovation<sup>34</sup>. Our detailed analysis on evolutionary trajectories of young human TSSs  
524 provide new strong evidence. We have shown that the repeat-derived TSSs are tightly  
525 constrained in the beginning and have limited functional impact, but after resolving  
526 genomic conflicts some are successfully incorporated into the existing regulatory  
527 network, turning “conflicts” into “benefits”<sup>34</sup>. In the long run, the repeat-derived TSSs  
528 contribute significantly to regulatory innovation. Interestingly, a similar evolutionary  
529 pattern was also observed in Alu exonization in primate genomes<sup>42</sup>, implying a  
530 commonly used strategy in genome evolution. Given the pervasiveness of repetitive  
531 sequences and the similarity of chromatin structures in eukaryotic genomes, the  
532 observed evolutionary processes involved in newly emerged TSSs in primate  
533 genomes could also exist in other eukaryotic groups. These evolutionary patterns also  
534 suggest the importance of balancing evolvability and robustness in genome  
535 evolution<sup>43</sup>.

536

## 537 **Methods**

### 538 **Human TSS annotation dataset**

539 We used the FANTOM 5 TSS dataset because it is the most comprehensive TSS  
540 annotation to date, cataloguing/encompassing the genome-wide TSS profiling of most  
541 major primary cell types and tissues in human. The high-confidence, “robust” TSSs  
542 from the latest FANTOM CAT annotation (<http://fantom.gsc.riken.jp/cat/>, part of  
543 FANTOM 5)<sup>28</sup> were used for our analyses, particularly as each TSS has been assigned  
544 a RNA-seq-defined transcript. Coding status and transcript classification of transcripts  
545 were defined as in the FANTOM CAT. To facilitate analysis and interpretation, we  
546 merged three lncRNA classes (“lncRNA\_antisense”, “lncRNA\_divergent” and  
547 “lncRNA\_sense\_intronic”) in the FANTOM CAT annotation into a class called  
548 “proximal lncRNA”, because these lncRNAs are proximal to other transcript units.  
549 We also merged several minor classes (“sense\_overlap\_RNA”, “short\_ncRNA”,  
550 “small\_RNA”, “structural\_RNA” and “uncertain\_coding”) into a class called “other  
551 RNA”. For TSSs which are associated with multiple types of transcripts, we assigned  
552 them hierarchically to the five categories: mRNA > proximal\_lncRNA >  
553 intergenic\_lncRNA > pseudogene > other\_RNA. As CAGE TSS peaks (i.e. tag  
554 clusters) usually span more than 1 bp, unless specified otherwise, we used the  
555 dominant TSS position (i.e. the most frequently used initiation site) of each TSS peak  
556 provided in the FANTOM annotation for most analyses.

### 557 **Categorization of human TSSs by sequence age**

558 To categorize human TSSs by the evolutionary age of the sequence, we made use of  
559 whole genome alignments between human (hg19) and 16 other mammalian genomes  
560 (**Supplementary Table 1**) from UCSC genome browser<sup>44</sup>. To estimate the sequence  
561 ages of human TSS loci, the UCSC liftOver tool was used to determine presence or  
562 absence of each human TSS sequence in other non-human genomes based on  
563 available pairwise chain alignment files from UCSC. We required a minimum  
564 mapping ratio of 90% for CAGE TSS peaks (~23bp in length on average), which  
565 usually covers Initiator (Inr) elements of promoters. The sequence proximal to Inr  
566 element has previously been found to be conserved in mammalian promoters<sup>14</sup>. In  
567 addition, we required a minimum mapping ratio of 50% for TSS peaks≥100 bp, which  
568 we considered as “core promoter” regions in our study and are usually under high



569 selective constraint<sup>14</sup>, although there is no standard definition for “core promoter”  
570 currently. To reduce potential false positives resulting from alignments of paralogous  
571 loci in two genomes, we further required a minimum alignment chain size of 10 kb for  
572 both target and query genomes. A human TSS locus satisfying the above criteria for  
573 the pairwise alignment was considered as having the orthologous sequence in the  
574 surveyed genome, and its sequence age should be equal to or larger than the age of  
575 last common ancestor of two species. The presence/absence patterns of TSSs were  
576 then used for defining the four TSS groups as described in the main text. We also tried  
577 multiple sets of thresholds for liftOver which did not result in notable variation in the  
578 grouping results (**Supplementary Table 2**), mainly because many newly emerged  
579 TSS loci were associated with TE insertions, which usually span more than 200 bp.

580 As some genomic regions are highly repetitive and could lead to poor assemblies and  
581 erroneous alignments, we filtered out any TSS whose  $\pm 1$  kb regions overlapping the  
582 blacklisted genomic regions (see **Supplementary Table 3**) defined in the ENCODE  
583 project and two other studies<sup>45,46</sup>. Because CAGE reads are usually short (20~70bp)<sup>27</sup>  
584 and can be mapped to the genome multiple times, we made use of the Duke 20-bp  
585 uniqueness track from UCSC browser to filter out the TSS peaks that have an average  
586 uniqueness score of  $<0.5$  (a 20-bp uniqueness score of  $<0.5$  means that a 20-mer can  
587 be mapped to the human genome more than twice). After excluding these blacklist  
588 regions, we still observed that some TSS loci, which are usually associated with low-  
589 complexity tandem repeats, exhibited suspiciously high read depths in some  
590 functional datasets, suggesting they might be artifacts due to poor mappability for  
591 short reads in those regions. Therefore we further filtered out any TSS harboring more  
592 than 10% (200 bp) of tandem repeats in the 2 kb region centered on the TSS. In  
593 addition, TSSs of chrM and chrY were excluded from all analyses because some  
594 genome assemblies or functional datasets lack data for these genomic sequences.

595 When analyzing the remaining TSSs, we further found two significant sources of  
596 putative false positives. One is the pseudogene-associated TSSs. Pseudogenes  
597 (especially processed pseudogenes) were reported as a notable source of false  
598 positives for CAGE-defined TSSs because of their high sequence similarity to  
599 original gene loci and the short lengths of CAGE reads<sup>47</sup>. For the GM12878 cell line,  
600 only 3.7% of the pseudogene TSSs in primate lineages from FANTOM 5 can be found  
601 in the previously published GRO-cap-defined TSSs (**Supplementary Fig. 6**)<sup>5</sup>.



602 Therefore we excluded all pseudogene TSSs from downstream analyses. Another  
603 source of false positives is the TSSs associated with poly(A) or poly(T) tracts. We  
604 initially found many young TSSs in FANTOM 5 located around the 3' poly(A) region  
605 and the A-rich linker region of Alu elements. However, in the GM12878 cell line,  
606 only 5.2% of the poly(dA:dT)-associated TSSs in primate lineages from FANTOM 5  
607 can be found in the GRO-cap-defined TSSs (**Supplementary Fig. 6**). On the other  
608 hand, a much larger fraction (43%) of the TSSs that are not associated with  
609 pseudogenes and poly(dA:dT) tracts can be found in the GRO-cap-defined TSS  
610 dataset. Such a large difference in the overlapping ratio suggests that the TSSs  
611 associated with poly(dA:dT) tracts have a high fraction of false positives. A recent  
612 study also suggested that Alu sequences generally lack the capacity to drive  
613 autonomous transcription<sup>20</sup>. Therefore we filtered out the TSSs flanked by a tandem  
614 repeat with A content of >50 % or T content of >50 % within  $\pm 100$  bp.

#### 615 **Analysis of TATA-box and CpG islands (CGI)**

616 The data of CGI annotation in the human genome was from Cohen et al. (2011)<sup>48</sup>. A  
617 TSS was considered as CGI-associated if its core promoter region (TSS $\pm 100$  bp)  
618 overlaps a CGI. TATA-box hits were predicted by R package “seqPattern” using the  
619 TBP position-weighted matrix with a minimum score of 80%. A TSS was considered  
620 as TATA-box-associated if the start of a TATA-box motif is located at 25~35 bp  
621 upstream of the TSS.

#### 622 **Analysis of repeats associated with TSSs**

623 The annotation of transposable elements in our analysis was based on RepeatMasker  
624 annotation of the hg19 assembly, downloaded from <http://www.repeatmasker.org>  
625 (Repeat Library 20140131)<sup>24</sup>. In addition, as young TSS loci are frequently associated  
626 with tandem repeats, tandem repeats annotated by TRF (downloaded from UCSC) and  
627 STRcat<sup>26</sup> were also used. The “Simple repeat”, “Low complexity” and “Satellite”  
628 families in RepeatMasker were considered as tandem repeats in our analysis. The  
629 tandem repeats from RepeatMasker, TRF and STRcat were merged into a union  
630 dataset. For overlapping tandem repeats in these three datasets, the priority order for  
631 being included in the union dataset was STRcat > TRF > RepeatMasker.

632 To investigate the repeat content around TSS loci, we first identified the nearest repeat  
633 element to each TSS and counted how many TSSs harbored repeat elements within  
634 TSS±100 bp regions (i.e. core promoter regions in this study). Since retrotransposons  
635 and tandem repeats were the main types of TSS-associated repeats and many tandem  
636 repeats were derived from retrotransposons, for each TSS group defined by sequence  
637 age, we further defined four TSS subgroups (‘SINE-associated’, ‘LINE-associated’,  
638 ‘LTR-associated’ and ‘Others’) based on the nearest retrotransposon within 100 bp of  
639 the TSS. The statistics of subgroups defined by transcript types and associated  
640 retrotransposons are given in **Supplementary Table 4**.

641 To analyze the distributions of TSSs along repeat elements, we calculated the relative  
642 distances of TSSs to the 5’ (corresponding to 0% of the full-length) of corresponding  
643 repeat subfamily consensus sequences based on the alignment information provided in  
644 RepeatMasker annotation. When investigating distances of young TSSs to ChIA-PET  
645 interaction loci of CTCF or RAD21, we only considered the interaction pairs whose  
646 sequences could be found in at least one of the six non-primate mammalian genomes  
647 listed in **Supplementary Table 1**, based on the liftOver mapping with parameters “-  
648 minMatch=0.5 -minChainT=10000 -minChainQ=10000”. The chromatin interactions  
649 in these mammalian-conserved loci are likely established before emergence of  
650 primates and conserved among mammals.

### 651 **Evolutionary rate analysis**

652 To investigate the evolutionary rates around TSS loci, we extracted alignments of  
653 human and 14 other mammalian genomes for all TSS and their surrounding 2 kb  
654 regions from the 100-way MULTIZ genome alignments from UCSC (all species used  
655 for analysis are listed in **Supplementary Table 1**; tarSyr1 and micMur1 were not in  
656 the 100-way alignments and thus not included in this analysis). To improve the  
657 alignment quality, the extracted MULTIZ alignments were re-aligned using PRANK  
658 with parameter “+F”, which was found to generate more accurate gapped alignments  
659 for evolutionary analysis<sup>49</sup>. The re-alignment results were then used to infer ancestral  
660 sequences for each TSS locus using FASTML<sup>50</sup> with parameters “--SubMatrix HKY -  
661 jointReconstruction no --indelReconstruction ML”. FASTML produced posterior  
662 probabilities for each position of inferred ancestral sequences. Positions with low-  
663 confidence inferred sequences (maximum marginal probability of <0.8) were

664 excluded for subsequent analyses. Evolutionary sequence changes (substitutions,  
665 insertions and deletions) in TSS loci in different periods were identified by comparing  
666 inferred ancestral sequences and derived sequences, and these changes were used to  
667 calculate substitution, insertion, and deletion rates for each period respectively. To  
668 estimate the genomic average evolutionary rates, we generated 10,000 random 2-kb  
669 intervals from the human genome, and ran the same analysis pipeline as described  
670 above for the TSS loci. The relative rates of substitutions, insertions and deletions in  
671 TSS loci were then obtained by dividing the original rates by genomic average rates  
672 estimated from random intervals.

### 673 **Analysis of mutational mechanisms**

674 Because spontaneous deamination of methylated cytosines (causing cytosine to  
675 thymine substitutions) was found to be a major source of mutations during evolution,  
676 we analyzed the germline DNA methylation levels to investigate the impact of  
677 methylation on the evolutionary rates of different TSS groups. We used the published  
678 germline DNA methylation data from Guo et al. (2015)<sup>51</sup> and focused on the CpG  
679 methylation events. The methylome of male primordial germ cells of 7-weeks old  
680 embryos was used in our analysis, because this sample exhibited a high degree of  
681 methylation across the genome, as shown in that study. Data of recombination rates in  
682 human populations was from the HapMap project<sup>52</sup>. The completeness status (solitary  
683 or non-solitary) of LTRs was predicted by REannotate<sup>53</sup> with parameters “-n -c”,  
684 using the RepeatMasker annotation as input.

### 685 **Analysis of functional signatures of TSSs**

686 Processed data (files of normalized signals and called peaks) of Dnase I-seq, ChIP-seq  
687 and DNA methylation (WGBS) of ENCODE cell lines (GM12878, K562 and H1-  
688 hESC) were downloaded from ENCODE website and ENSEMBL database. Analysis  
689 and visualization of functional genomics data on the TSS groups and subgroups were  
690 performed with BEDtools, R, seqplots<sup>54</sup> and deeptools<sup>55</sup>.

691 ChIA-PET data for CTCF and RNAPII in GM12878 were from Tang et al. (2015)<sup>38</sup>.  
692 ChIA-PET data for RAD21 in GM12878 were from Grubert et al. (2015)<sup>56</sup>. ChIA-  
693 PET data for RNAPII in K562 cell line were downloaded from the ENCODE website.

### 694 **Regulatory variant analysis**

695 The ongoing genomic changes (polymorphic sites) affecting the regulatory outcomes  
696 of TSSs in human populations can be considered as a snapshot of regulatory evolution  
697 of TSSs. Investigation of these regulatory variants would help to understand how the  
698 regulatory impact of TSSs changes over time. Therefore, we analyzed published  
699 regulatory variants which affect transcription-related molecular traits, such as TF  
700 binding, histone marks, DNA methylation and DNase I hypersensitivity (DHS) from  
701 several genome-wide studies.

702 Regulatory variants for allele-specific DHS in multiple cell types were from Maurano  
703 et al. (2015)<sup>57</sup>. Regulatory variants for allele-specific CpG methylation in multiple  
704 cell types were from Schultz et al. (2015)<sup>58</sup>. Three types of histone mark QTLs  
705 (H3K4me3, H3K4me1 and H3K27ac) of lymphoblastoid cell lines (LCLs) were from  
706 Grubert et al. (2015)<sup>56</sup>. For the data from Grubert et al. (2015), we only used the  
707 regulatory variants that are located within the corresponding regulated histone peak  
708 regions for analysis. Binding QTLs of 5 TFs (JunD, NF- $\kappa$ B, Pou2f1, PU.1 and Stat1)  
709 and H3K4me3 QTLs in LCLs were from Tehranchi et al. (2016)<sup>59</sup>. The derived allele  
710 frequencies (DAFs) of variants were based on the data of 1000 genomes project phase  
711 3 release and only variants with known ancestral alleles were used for analysis. For  
712 each type of regulatory variant, we calculated the proportion of TSSs harboring at  
713 least one regulatory variant within 1 kb of the TSS. To account for the issue of  
714 possible duplicated counts of adjacent TSS loci, we repeated the analysis after  
715 excluding all the TSSs separated by less than 2 kb for to prevent duplicated counts.  
716 We also repeated the analysis for datasets under three different minimum DAFs (0.01,  
717 0.1 and 0.5).

718

### 719 **Data availability**

720 All the analyses in this study were based on published datasets. A table of data source  
721 links is given in **Supplementary Table 5**. A table containing the defined TSS  
722 groups/subgroups in this study is provided in **Supplementary Table 6**. All other data  
723 are available from the authors upon reasonable request.

724

725

## 726 **Acknowledgments**

727 We are most grateful to Jernej Ule, Anna Poetsch, Jan Attig and Anob Chakrabarti for  
728 insightful comments on earlier versions of the manuscript. We also thank all the  
729 members of Luscombe lab for helpful advice and discussions throughout the project.  
730 This work is supported by the Francis Crick Institute which receives its core funding  
731 from Cancer Research UK (FC001110), the UK Medical Research Council  
732 (FC001110), and the Wellcome Trust (FC001110) (N.M.L.). N.M.L. is also supported  
733 by a Wellcome Trust Investigator Award and core funding from the Okinawa Institute  
734 of Science & Technology. C.L. is funded by a EMBO long-term postdoctoral  
735 fellowship (ALTF 1499-2016).

## 736 **Author Contributions**

737 C.L. conceived the project, with considerable discussion with N.M.L. C.L. performed  
738 the analyses and drafted the manuscript; N.M.L. supervised the project and  
739 contributed extensively to the writing and revising of the manuscript. B. L. provided  
740 important advice and contributed to the writing and revising of the manuscript.

## 741 **Competing financial interests**

742 The authors declare no competing financial interests.

743

## 744 **References**

- 745 1 Clark, M. B. *et al.* The reality of pervasive transcription. *PLoS biology* **9**,  
746 e1000625; discussion e1001102, doi:10.1371/journal.pbio.1000625 (2011).  
747 2 Wade, J. T. & Grainger, D. C. Pervasive transcription: illuminating the dark  
748 matter of bacterial transcriptomes. *Nature reviews. Microbiology* **12**, 647-653,  
749 doi:10.1038/nrmicro3316 (2014).  
750 3 Djebali, S. *et al.* Landscape of transcription in human cells. *Nature* **489**, 101-  
751 108, doi:10.1038/nature11233 (2012).  
752 4 FANTOM Consortium *et al.* A promoter-level mammalian expression atlas.  
753 *Nature* **507**, 462-470, doi:10.1038/nature13182 (2014).  
754 5 Core, L. J. *et al.* Analysis of nascent RNA identifies a unified architecture of  
755 initiation regions at mammalian promoters and enhancers. *Nature genetics*  
756 **46**, 1311-1320, doi:10.1038/ng.3142 (2014).  
757 6 Core, L. J., Waterfall, J. J. & Lis, J. T. Nascent RNA sequencing reveals  
758 widespread pausing and divergent initiation at human promoters. *Science*  
759 **322**, 1845-1848, doi:10.1126/science.1162228 (2008).

- 760 7 Kim, T. K. & Shiekhattar, R. Architectural and Functional Commonalities  
761 between Enhancers and Promoters. *Cell* **162**, 948-959,  
762 doi:10.1016/j.cell.2015.08.008 (2015).
- 763 8 Li, W., Notani, D. & Rosenfeld, M. G. Enhancers as non-coding RNA  
764 transcription units: recent insights and future perspectives. *Nature reviews.*  
765 *Genetics* **17**, 207-223, doi:10.1038/nrg.2016.4 (2016).
- 766 9 Andersson, R. *et al.* An atlas of active enhancers across human cell types and  
767 tissues. *Nature* **507**, 455-461, doi:10.1038/nature12787 (2014).
- 768 10 Frith, M. C. *et al.* Evolutionary turnover of mammalian transcription start sites.  
769 *Genome research* **16**, 713-722, doi:10.1101/gr.5031006 (2006).
- 770 11 Main, B. J., Smith, A. D., Jang, H. & Nuzhdin, S. V. Transcription start site  
771 evolution in Drosophila. *Molecular biology and evolution* **30**, 1966-1974,  
772 doi:10.1093/molbev/mst085 (2013).
- 773 12 Yokoyama, K. D., Thorne, J. L. & Wray, G. A. Coordinated genome-wide  
774 modifications within proximal promoter cis-regulatory elements during  
775 vertebrate evolution. *Genome biology and evolution* **3**, 66-74,  
776 doi:10.1093/gbe/evq078 (2011).
- 777 13 Young, R. S. *et al.* The frequent evolutionary birth and death of functional  
778 promoters in mouse and human. *Genome research* **25**, 1546-1557,  
779 doi:10.1101/gr.190546.115 (2015).
- 780 14 Taylor, M. S. *et al.* Heterotachy in mammalian promoter evolution. *PLoS*  
781 *genetics* **2**, e30, doi:10.1371/journal.pgen.0020030 (2006).
- 782 15 Ward, L. D. & Kellis, M. Evidence of abundant purifying selection in humans  
783 for recently acquired regulatory functions. *Science* **337**, 1675-1678,  
784 doi:10.1126/science.1225057 (2012).
- 785 16 Scala, G., Affinito, O., Miele, G., Monticelli, A. & Coccozza, S. Evidence for  
786 evolutionary and nonevolutionary forces shaping the distribution of human  
787 genetic variants near transcription start sites. *PLoS one* **9**, e114432,  
788 doi:10.1371/journal.pone.0114432 (2014).
- 789 17 Schor, I. E. *et al.* Promoter shape varies across populations and affects  
790 promoter evolution and expression noise. *Nature genetics* **49**, 550-558,  
791 doi:10.1038/ng.3791 (2017).
- 792 18 Faulkner, G. J. *et al.* The regulated retrotransposon transcriptome of  
793 mammalian cells. *Nature genetics* **41**, 563-571, doi:10.1038/ng.368 (2009).
- 794 19 Nguyen, T. A. *et al.* High-throughput functional comparison of promoter and  
795 enhancer activities. *Genome research* **26**, 1023-1033,  
796 doi:10.1101/gr.204834.116 (2016).
- 797 20 van Arensbergen, J. *et al.* Genome-wide mapping of autonomous promoter  
798 activity in human cells. *Nature biotechnology* **35**, 145-153,  
799 doi:10.1038/nbt.3754 (2017).
- 800 21 Lenhard, B., Sandelin, A. & Carninci, P. Metazoan promoters: emerging  
801 characteristics and insights into transcriptional regulation. *Nature reviews.*  
802 *Genetics* **13**, 233-245, doi:10.1038/nrg3163 (2012).
- 803 22 Sawaya, S. *et al.* Microsatellite tandem repeats are abundant in human  
804 promoters and are associated with regulatory elements. *PLoS one* **8**, e54710,  
805 doi:10.1371/journal.pone.0054710 (2013).
- 806 23 Bilgin Sonay, T. *et al.* Tandem repeat variation in human and great ape  
807 populations and its impact on gene expression divergence. *Genome research*  
808 **25**, 1591-1599, doi:10.1101/gr.190868.115 (2015).
- 809 24 Tarailo-Graovac, M. & Chen, N. Using RepeatMasker to identify repetitive  
810 elements in genomic sequences. *Current protocols in bioinformatics* **Chapter**  
811 **4**, Unit 4 10, doi:10.1002/0471250953.bi0410s25 (2009).



- 812 25 Benson, G. Tandem repeats finder: a program to analyze DNA sequences.  
813 *Nucleic acids research* **27**, 573-580 (1999).
- 814 26 Willems, T. *et al.* The landscape of human STR variation. *Genome research*  
815 **24**, 1894-1904, doi:10.1101/gr.177774.114 (2014).
- 816 27 Kanamori-Katayama, M. *et al.* Unamplified cap analysis of gene expression on  
817 a single-molecule sequencer. *Genome research* **21**, 1150-1159,  
818 doi:10.1101/gr.115469.110 (2011).
- 819 28 Hon, C. C. *et al.* An atlas of human long non-coding RNAs with accurate 5'  
820 ends. *Nature* **543**, 199-204, doi:10.1038/nature21374 (2017).
- 821 29 Ohadi, M. *et al.* Core promoter short tandem repeats as evolutionary switch  
822 codes for primate speciation. *American journal of primatology* **77**, 34-43,  
823 doi:10.1002/ajp.22308 (2015).
- 824 30 Gymrek, M. *et al.* Abundant contribution of short tandem repeats to gene  
825 expression variation in humans. *Nature genetics* **48**, 22-29,  
826 doi:10.1038/ng.3461 (2016).
- 827 31 Slotkin, R. K. & Martienssen, R. Transposable elements and the epigenetic  
828 regulation of the genome. *Nature reviews. Genetics* **8**, 272-285,  
829 doi:10.1038/nrg2072 (2007).
- 830 32 Merckenschlager, M. & Odom, D. T. CTCF and cohesin: linking gene regulatory  
831 elements with their targets. *Cell* **152**, 1285-1297,  
832 doi:10.1016/j.cell.2013.02.029 (2013).
- 833 33 Pratto, F. *et al.* Recombination initiation maps of individual human genomes.  
834 *Science* **346**, 1256442, doi:10.1126/science.1256442 (2014).
- 835 34 Chuong, E. B., Elde, N. C. & Feschotte, C. Regulatory activities of  
836 transposable elements: from conflicts to benefits. *Nature reviews. Genetics*  
837 **18**, 71-86, doi:10.1038/nrg.2016.139 (2017).
- 838 35 Baudat, F., Imai, Y. & de Massy, B. Meiotic recombination in mammals:  
839 localization and regulation. *Nature reviews. Genetics* **14**, 794-806,  
840 doi:10.1038/nrg3573 (2013).
- 841 36 Eckert, K. A. & Hile, S. E. Every microsatellite is different: Intrinsic DNA  
842 features dictate mutagenesis of common microsatellites present in the human  
843 genome. *Molecular carcinogenesis* **48**, 379-388, doi:10.1002/mc.20499  
844 (2009).
- 845 37 Kelkar, Y. D., Tyekucheva, S., Chiaromonte, F. & Makova, K. D. The genome-  
846 wide determinants of human and chimpanzee microsatellite evolution.  
847 *Genome research* **18**, 30-38, doi:10.1101/gr.7113408 (2008).
- 848 38 Tang, Z. *et al.* CTCF-Mediated Human 3D Genome Architecture Reveals  
849 Chromatin Topology for Transcription. *Cell* **163**, 1611-1627,  
850 doi:10.1016/j.cell.2015.11.024 (2015).
- 851 39 Albert, F. W. & Kruglyak, L. The role of regulatory variation in complex traits  
852 and disease. *Nature reviews. Genetics* **16**, 197-212, doi:10.1038/nrg3891  
853 (2015).
- 854 40 Cheng, C. *et al.* Understanding transcriptional regulation by integrative  
855 analysis of transcription factor binding data. *Genome research* **22**, 1658-1667,  
856 doi:10.1101/gr.136838.111 (2012).
- 857 41 GTEx Consortium. Human genomics. The Genotype-Tissue Expression (GTEx)  
858 pilot analysis: multitissue gene regulation in humans. *Science* **348**, 648-660,  
859 doi:10.1126/science.1262110 (2015).
- 860 42 Attig, J. *et al.* Splicing repression allows the gradual emergence of new Alu-  
861 exons in primate evolution. *eLife* **5**, doi:10.7554/eLife.19545 (2016).
- 862 43 Wagner, A. *Robustness and Evolvability in Living Systems*. (Princeton  
863 University Press, 2007).

- 864 44 Tyner, C. *et al.* The UCSC Genome Browser database: 2017 update. *Nucleic*  
865 *acids research* **45**, D626-D634, doi:10.1093/nar/gkw1134 (2017).
- 866 45 Li, W. & Freudenberg, J. Characterizing regions in the human genome  
867 unmappable by next-generation-sequencing at the read length of 1000 bases.  
868 *Computational biology and chemistry* **53 Pt A**, 108-117,  
869 doi:10.1016/j.compbiolchem.2014.08.015 (2014).
- 870 46 Pickrell, J. K., Gaffney, D. J., Gilad, Y. & Pritchard, J. K. False positive peaks  
871 in ChIP-seq and other sequencing-based functional assays caused by  
872 unannotated high copy number regions. *Bioinformatics* **27**, 2144-2146,  
873 doi:10.1093/bioinformatics/btr354 (2011).
- 874 47 Zhao, X., Valen, E., Parker, B. J. & Sandelin, A. Systematic clustering of  
875 transcription start site landscapes. *PLoS one* **6**, e23409,  
876 doi:10.1371/journal.pone.0023409 (2011).
- 877 48 Cohen, N. M., Kenigsberg, E. & Tanay, A. Primate CpG islands are maintained  
878 by heterogeneous evolutionary regimes involving minimal selection. *Cell* **145**,  
879 773-786, doi:10.1016/j.cell.2011.04.024 (2011).
- 880 49 Loytynoja, A. & Goldman, N. Phylogeny-aware gap placement prevents errors  
881 in sequence alignment and evolutionary analysis. *Science* **320**, 1632-1635,  
882 doi:10.1126/science.1158395 (2008).
- 883 50 Ashkenazy, H. *et al.* FastML: a web server for probabilistic reconstruction of  
884 ancestral sequences. *Nucleic acids research* **40**, W580-584,  
885 doi:10.1093/nar/gks498 (2012).
- 886 51 Guo, F. *et al.* The Transcriptome and DNA Methylome Landscapes of Human  
887 Primordial Germ Cells. *Cell* **161**, 1437-1452, doi:10.1016/j.cell.2015.05.015  
888 (2015).
- 889 52 International HapMap Consortium *et al.* A second generation human  
890 haplotype map of over 3.1 million SNPs. *Nature* **449**, 851-861,  
891 doi:10.1038/nature06258 (2007).
- 892 53 Pereira, V. Automated paleontology of repetitive DNA with REANNOTATE.  
893 *BMC genomics* **9**, 614, doi:10.1186/1471-2164-9-614 (2008).
- 894 54 Stempor, P. & Ahringer, J. SeqPlots - Interactive software for exploratory  
895 data analyses, pattern discovery and visualization in genomics. *Wellcome*  
896 *open research* **1**, 14, doi:10.12688/wellcomeopenres.10004.1 (2016).
- 897 55 Ramirez, F., Dundar, F., Diehl, S., Gruning, B. A. & Manke, T. deepTools: a  
898 flexible platform for exploring deep-sequencing data. *Nucleic acids research*  
899 **42**, W187-191, doi:10.1093/nar/gku365 (2014).
- 900 56 Grubert, F. *et al.* Genetic Control of Chromatin States in Humans Involves  
901 Local and Distal Chromosomal Interactions. *Cell* **162**, 1051-1065,  
902 doi:10.1016/j.cell.2015.07.048 (2015).
- 903 57 Maurano, M. T. *et al.* Large-scale identification of sequence variants  
904 influencing human transcription factor occupancy in vivo. *Nature genetics* **47**,  
905 1393-1401, doi:10.1038/ng.3432 (2015).
- 906 58 Schultz, M. D. *et al.* Human body epigenome maps reveal noncanonical DNA  
907 methylation variation. *Nature* **523**, 212-216, doi:10.1038/nature14465 (2015).
- 908 59 Tehranchi, A. K. *et al.* Pooled ChIP-Seq Links Variation in Transcription Factor  
909 Binding to Complex Disease Risk. *Cell* **165**, 730-741,  
910 doi:10.1016/j.cell.2016.03.041 (2016).

911

912



913

## 914 **Figure legends**

915 **Fig. 1 Classification of human TSSs by evolutionary age.** (a) Statistics of four  
916 TSS groups defined by sequence age using genomic alignments. At the bottom is the  
917 phylogeny with colors indicating the corresponding period of each TSS group. (b) An  
918 example gene locus shows two ‘mammalian’ TSSs (red shade) and one ‘OWA’ TSS  
919 (cyan shade). An LTR element overlapping the young TSS can be seen at the bottom  
920 of the alignment. CAGE tag counts and transcript isoforms shown at the top were  
921 from FANTOM CAT annotation (part of FANTOM 5). Genome alignments  
922 represented by grey blocks and lines were generated using UCSC genome browser  
923 (hg19). (c) Composition of transcription type in each TSS group. Transcript types are  
924 derived from FANTOM CAT annotation. (d) Violin and box plots for TSS peak  
925 widths of each TSS group. (e) Proportions of TATA-box containing and TATA-less  
926 TSSs. (f) Proportions of CGI-associated and non-CGI-associated TSSs. Statistical  
927 significances in panel **d** were calculated by one-tailed Wilcoxon rank sum tests;  
928 statistical significances in panels **e** and **f** by Fisher’s exact tests; “\*\*\*”,  $p < 0.01$ ; “\*\*\*\*”,  
929  $p < 0.001$ .

930 **Fig. 2 Intrinsic and extrinsic factors contributing to the origin of new TSSs.** (a)  
931 Composition of major repeat families in four TSS groups. To obtain a non-redundant  
932 assignment, we considered the nearest repeat element within  $TSS \pm 100$  bp. (b)  
933 Distribution of young TSSs along the LTR/THE1B elements, with a bin size of 2% of  
934 its full-length consensus sequence. In the middle is the THE1B structure, which  
935 includes the original TSS, U3, R and U5 regions for the transposable element. (c)  
936 Distribution of young TSSs along the LINE/L1 elements, with a bin size of 2% of  
937 full-length consensus sequences. In the middle is the L1 structure, which indicates the  
938 sense and antisense L1 TSSs at 5’end. (d) Comparison of distances of TSS-associated  
939 and non-TSS-associated LTRs to the closest old TSSs. The distances of random  
940 intervals (generated by “bedtools shuffle” with TSS-associated LTRs as input) to the  
941 closest old TSSs are also provided for comparison. (e) Comparison of distances of  
942 TSS-associated and non-TSS-associated LTRs to the closest CTCF or RAD21 ChIA-  
943 PET peaks (GM12878). Random intervals used here is the same as that in panel **d**. (f)  
944 Exponential approximation for the number of genes with a certain number of TSSs

945 and number of TSSs per gene, based on data of all TSSs.  $R^2$  is the coefficient of  
946 determination for the linear regression in the figure. (g) Exponential approximation  
947 for the number of genes and number of newly gained TSSs per gene, based on data of  
948 newly emerged TSSs in three periods.  $R^2$  is the coefficient of determination.  
949 Statistical significances in panels **d** and **e** were calculated by one-tailed Wilcoxon  
950 rank sum tests; “\*\*\*”,  $p < 0.001$ .

951 **Fig. 3 Rapid sequence evolution of young TSSs.** (a) Left, a phylogeny of genomes  
952 used for evolutionary rate analysis, with arrows indicating the two evolutionary  
953 periods considered for calculating rates. Right, relative substitution rates (normalized  
954 by genomic average) inferred from genomic alignments for three TSS groups, using  
955 40 bins along  $TSS \pm 1$  kb for calculating the average rate in each bin. Best-fit curves  
956 were estimated by ‘loess’. (b) Violin and box plots for germline DNA methylation  
957 levels (a male germline dataset from Guo et al. 2015) for different TSS subgroups  
958 defined by the retrotransposon context. For each TSS, the average methylation level  
959 of CpGs was calculated for  $TSS \pm 1$  kb. (c) Frequencies of nucleotide substitution  
960 types in different TSS groups, based on the variants and ancestral alleles from the  
961 1000 genomes project. (d) Comparison of recombination rates among TSSs  
962 associated with different types of transposable elements and genomic background  
963 (‘random’). The recombination rate of each TSS was defined as the average rate for  
964  $TSS \pm 1$  kb. Background recombination rates were generated for randomly selected 2-  
965 kb windows in human genome. (e) The fraction of solitary LTRs in four TSS groups.  
966 (f) Distribution of tandem repeat (TR) lengths in four TSS groups. (g) An example  
967 plot depicting a possible TSS death event around an LTR. Statistical significances in  
968 panels **b**, **d** and **f** were calculated by one-tailed Wilcoxon rank sum tests. “\*”,  $p < 0.05$ ;  
969 “\*\*\*”,  $p < 0.01$ ; “\*\*\*\*”,  $p < 0.001$ ; N.S., not significant.

970 **Fig. 4 Distinct functional signatures in different TSS groups.** (a) Meta-profiles of  
971 DHS signals for four TSS groups using a 20bp bin size (same bin sizes for other  
972 panels). (b) Meta-profiles of H3K4me3 signals. (c) Meta-profiles of CpG methylation  
973 levels. (d) Meta-profiles of coverage ratio by TF ChIP-seq peaks. Previously called  
974 peaks of 88 TF ChIP-seq datasets from ENCODE were merged together, and for each  
975 bin of each TSS locus we calculated how much is covered by merged peaks. (e) Meta-  
976 profiles of coverage ratio by RNAP II ChIA-PET peaks. (f) Meta-profiles of RNAP II  
977 ChIP-seq signals. (g) Distribution of maximum expression levels of TSSs across

978 primary cell samples, based on the expression data of FANTOM CAT annotation. (**h-**  
979 **n**) Produced using the same methods as for panels **a-g**, but specifically for the OWA  
980 TSSs which were divided into subgroups of different transcript types. All functional  
981 genomic data except the expression data are for the GM12878 cell line.

982 **Fig. 5 Temporal and spatial constraints on the regulatory evolution of young**  
983 **TSSs.** (**a**) Top, proportion of TSSs harboring regulatory variants associated with  
984 allele-specific DHS within TSS±1 kb for each TSS group; above the bars are the  
985 numbers of TSSs with regulatory variants. Bottom, proportion of TSSs harboring  
986 regulatory variants in different TSS subgroups, defined by transcript type. (**b**)  
987 Proportion of TSSs harboring variants associated with allele-specific methylation  
988 within TSS±1 kb. (**c**) Proportion of TSSs harboring H3K4me3 QTLs within TSS±1  
989 kb. Data generated from lymphoblastoid cell lines (LCLs). (**d**) Proportion of TSSs  
990 harboring NF-kb binding QTLs within TSS±1 kb. Data generated from LCLs. (**e**) A  
991 schematic illustration depicting different possible evolutionary paths for young TSSs.  
992 (**f**) A young TSS *cis*-proximal to old TSSs. Top, FANTOM CAT transcript models  
993 (red for forward-strand, blue for reverse-strand); genome alignments and TE  
994 annotations obtained from the UCSC genome browser. Bottom, enlarged region of an  
995 ‘OWA’ TSS inside a LINE element. Below the alignments are the common SNPs  
996 (allele frequency  $\geq 0.01$ ) from the dbSNP database and SNPs associated with  
997 regulatory variation within this region. (**g**) A young TSS *trans*-proximal to old TSSs.  
998 Top, similar to panel **f** but with additional CTCF and RNAP II ChIA-PET interaction  
999 data for GM12878 cell line. Bottom, enlarged region of the young TSS inside a LTR  
1000 element. Below the alignments are the common SNPs (allele frequency  $\geq 0.01$ ) from  
1001 dbSNP database and the SNPs associated with regulatory variation within this region.

1002 **Fig. 6. Proposed evolution model for young TSSs.** The origin of new TSSs is  
1003 promoted by sequence-intrinsic and extrinsic factors. A typical intrinsic factor is the  
1004 promoter element in newly inserted retrotransposons. An important extrinsic factor is  
1005 the proximity to established regulatory modules as the proximity of a ‘proto-TSS’ to  
1006 established regulatory elements provides easier access to transcription machinery.  
1007 Newly emerged TSSs tend to be highly repressed and have limited regulatory capacity.  
1008 In the early phase, young TSSs undergo rapid sequence evolution allow genomic  
1009 conflicts associated with repeats to be resolved. Targeted mutational mechanisms  
1010 enable this rapid evolution, including DNA hypermethylation (methylated C to T

1011 mutations), recombination and tandem repeat instability. The accumulated changes  
1012 around young TSSs can reduce or eliminate the transpositional capacity of associated  
1013 TEs and stabilize associated tandem repeats. They may also lead to deaths of some  
1014 young TSSs. In the later phases, surviving TSSs gradually gain mutations in  
1015 surrounding regions which could increase their regulatory capacity (e.g. TF binding,  
1016 chromatin accessibility or transcription-associated histone modifications) and are  
1017 exapted by the host for transcriptional regulation. At the mature phase, TSSs tend to  
1018 have more permissive chromatin environments, enhanced spatial connectivity and  
1019 higher expression.

1020

**Figure 1****a**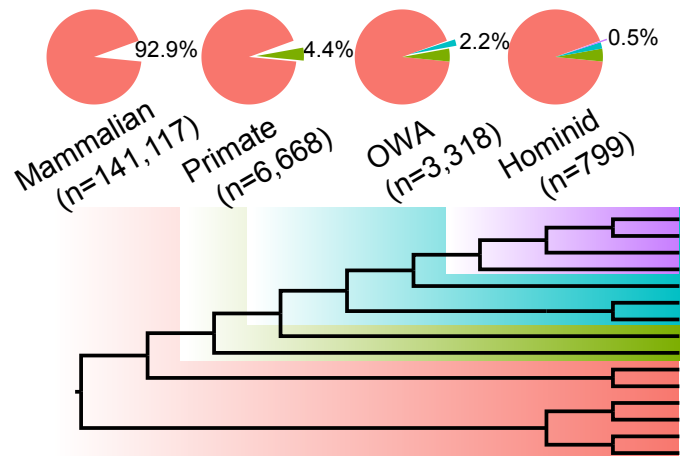**b**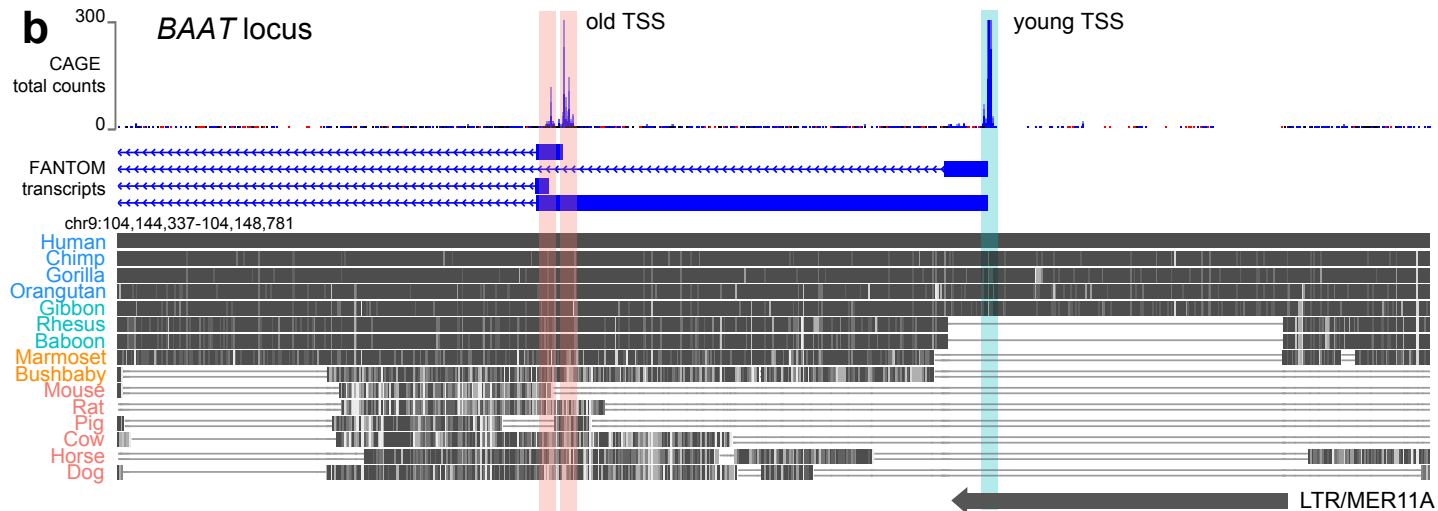**c**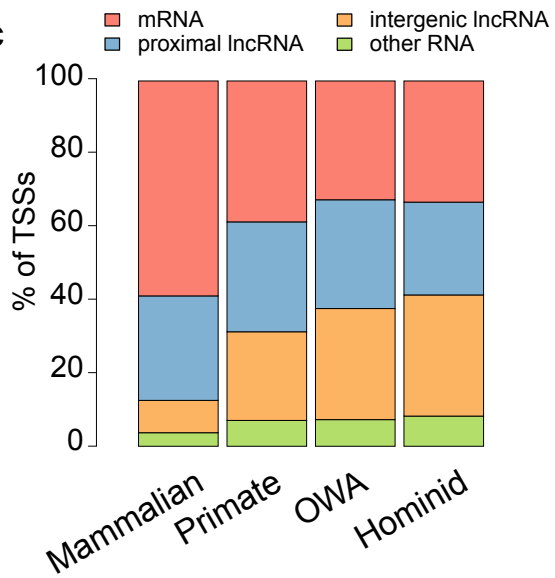**d**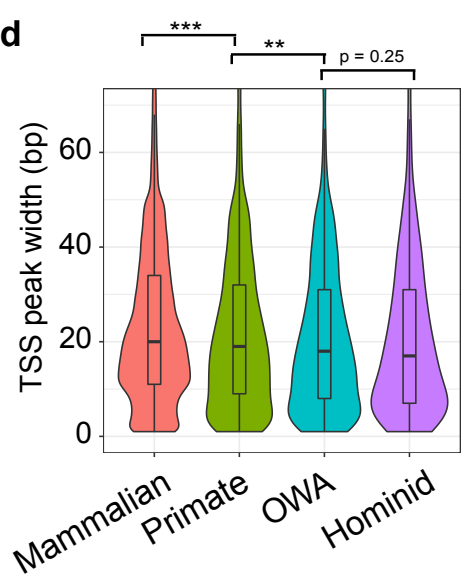**e**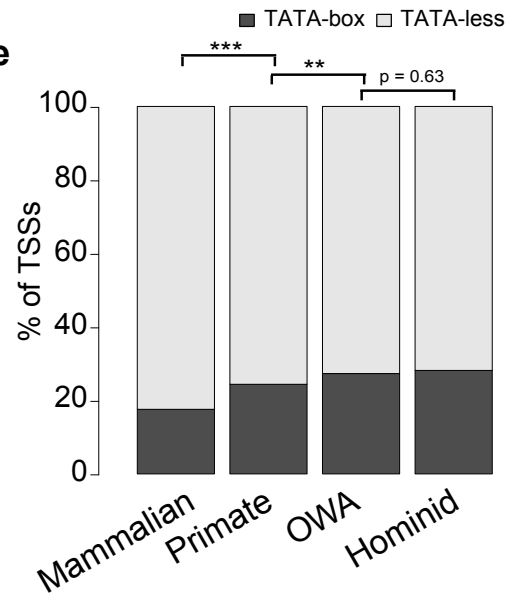**f**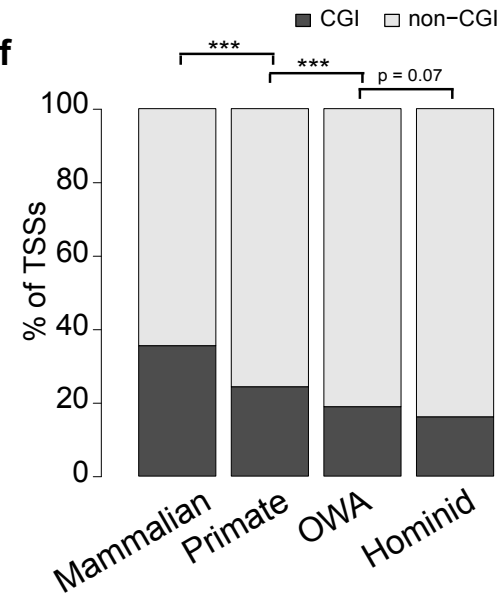

**Figure 2**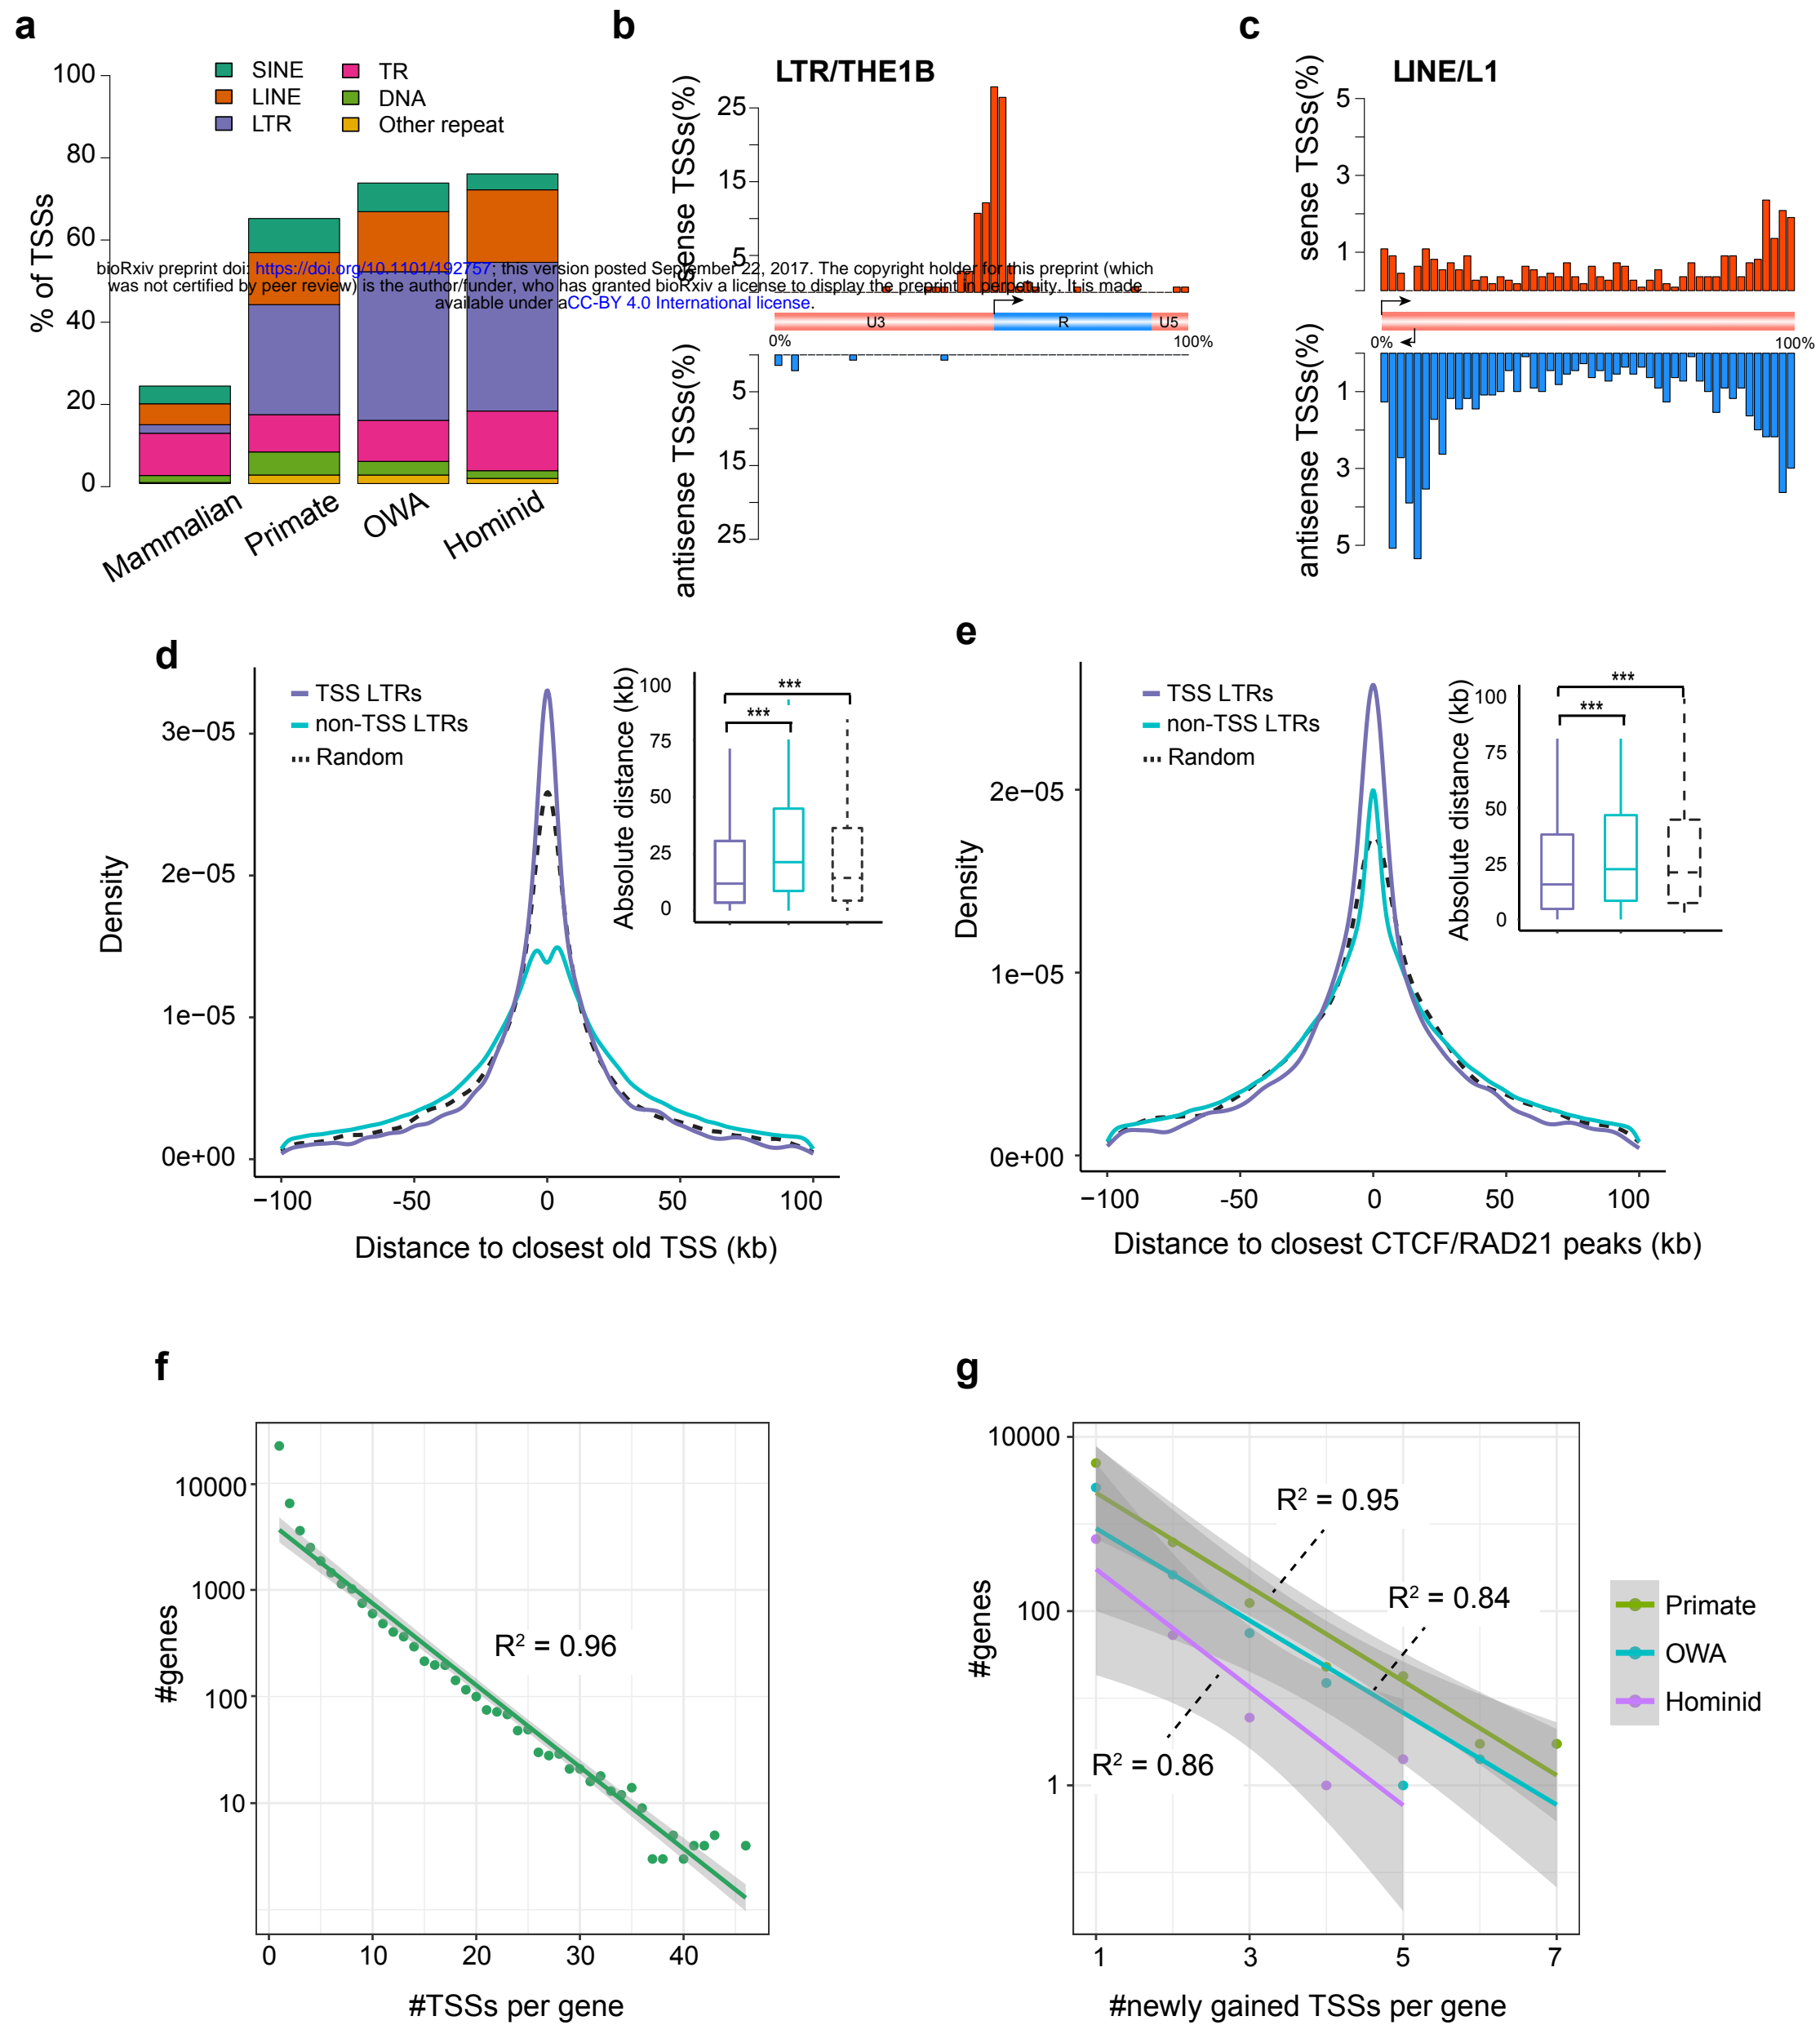

**Figure 3**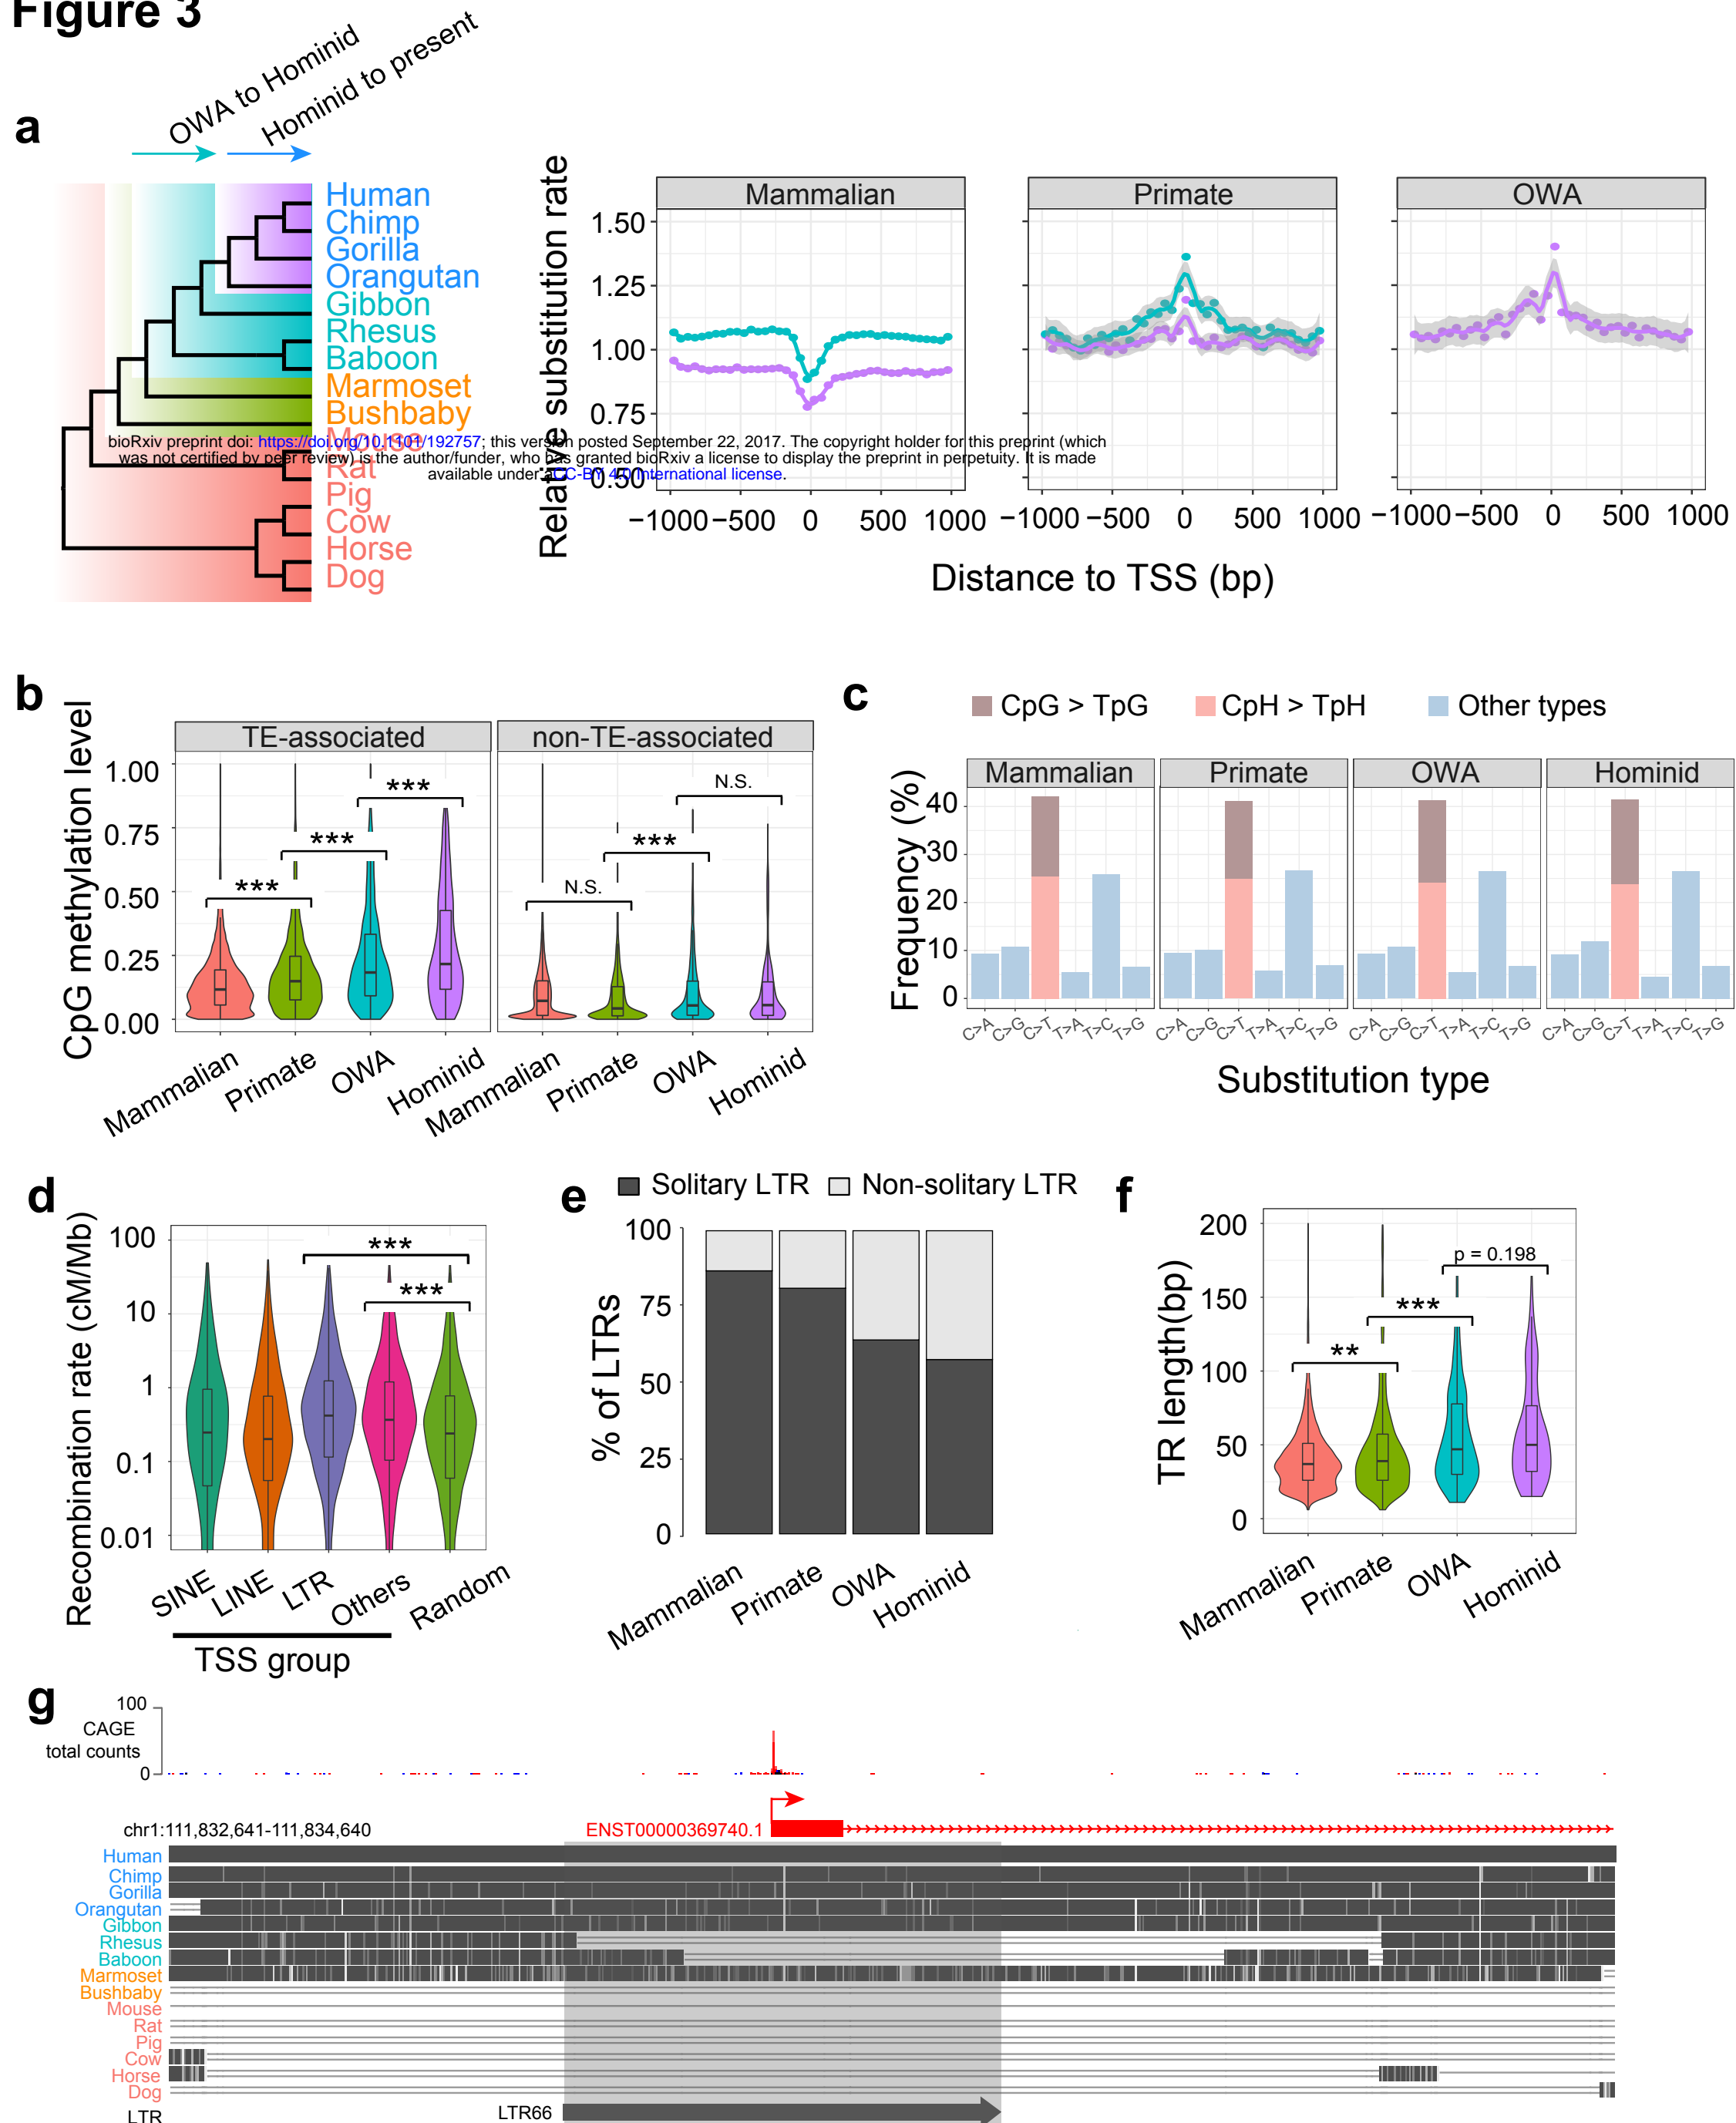



**Figure 4**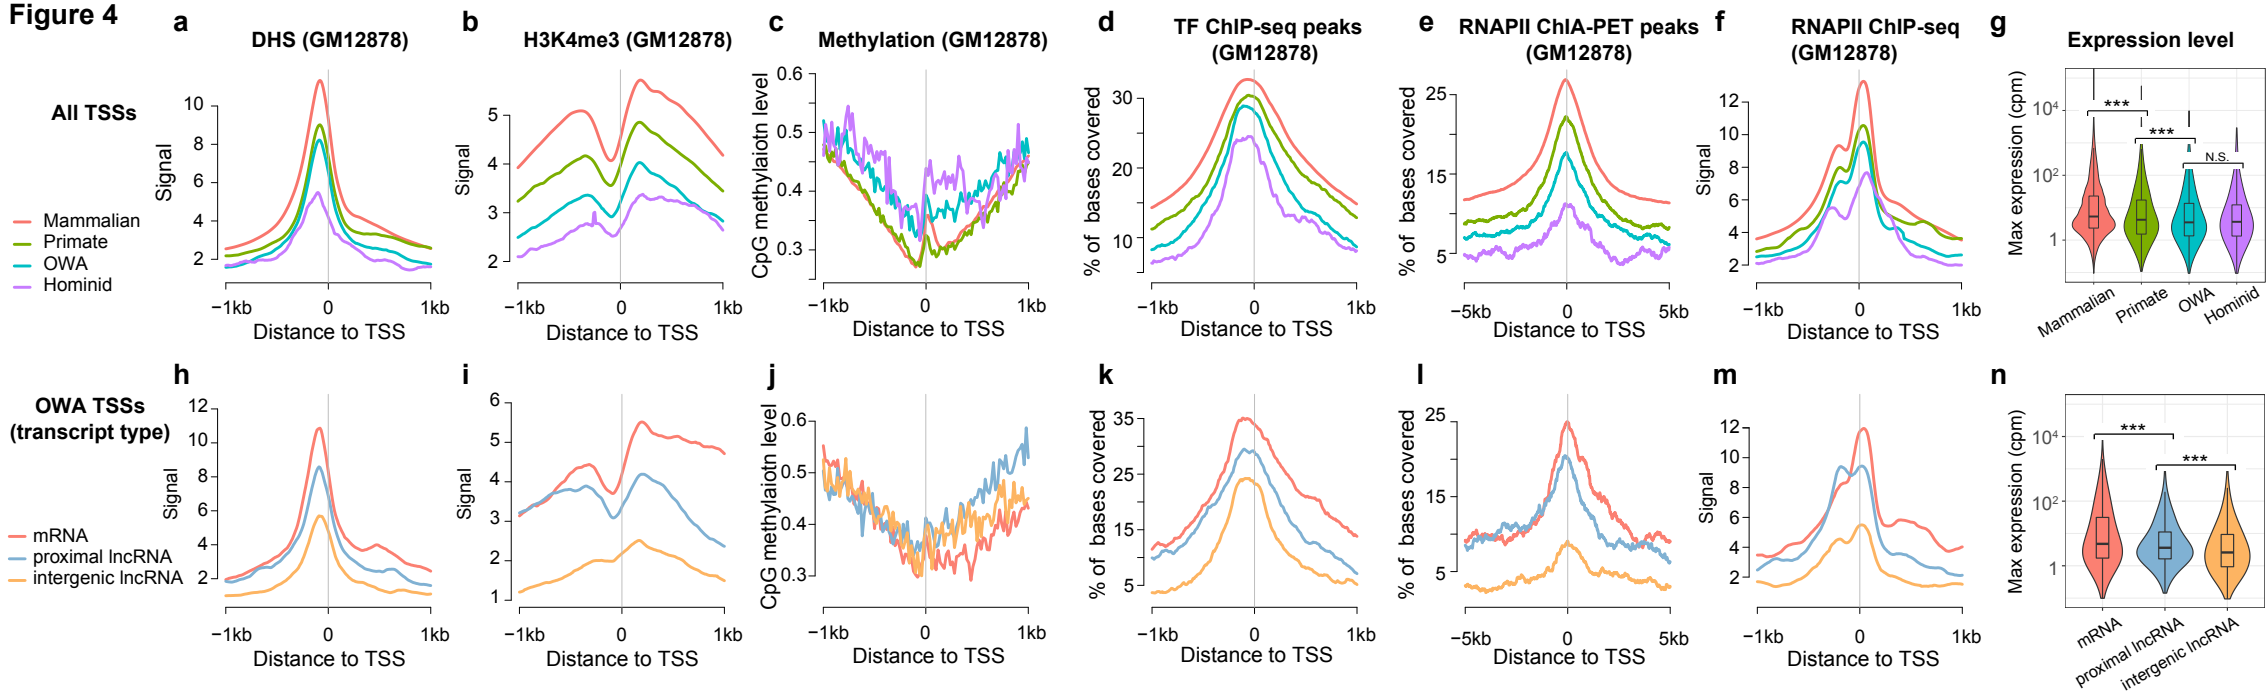



**Figure 5**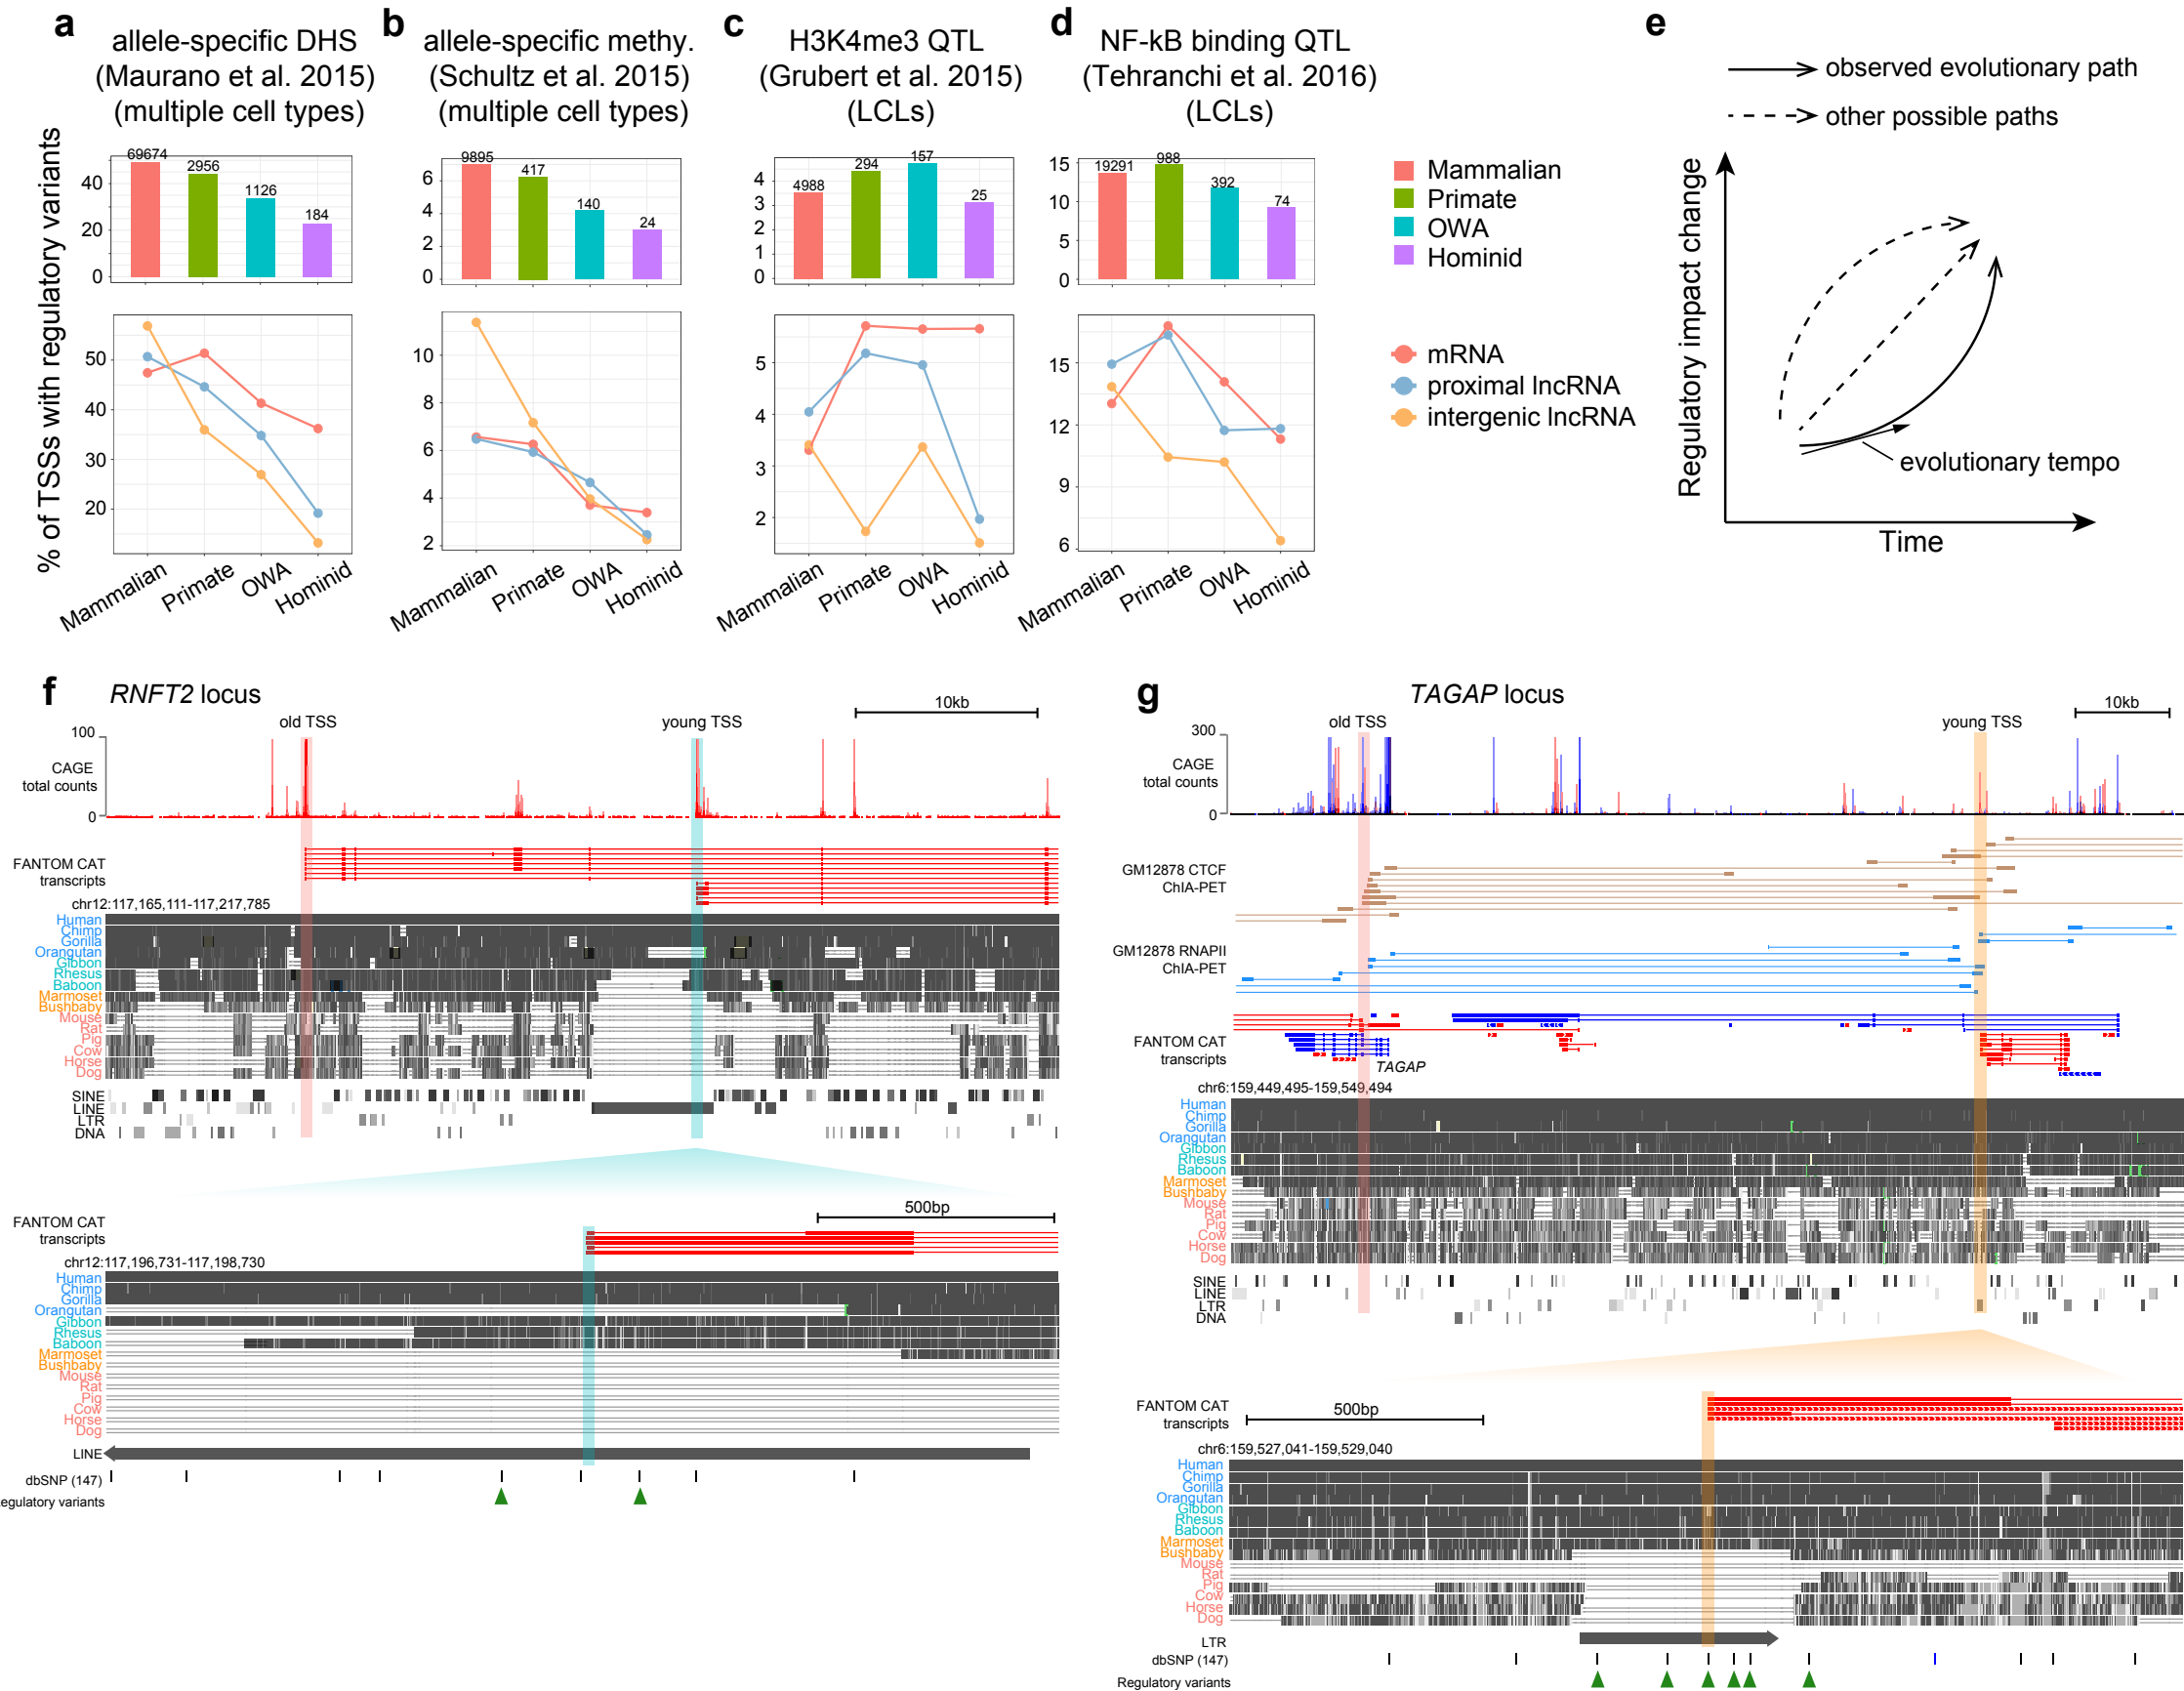

**Figure 6**

**Evolutionary trajectories of young TSSs**

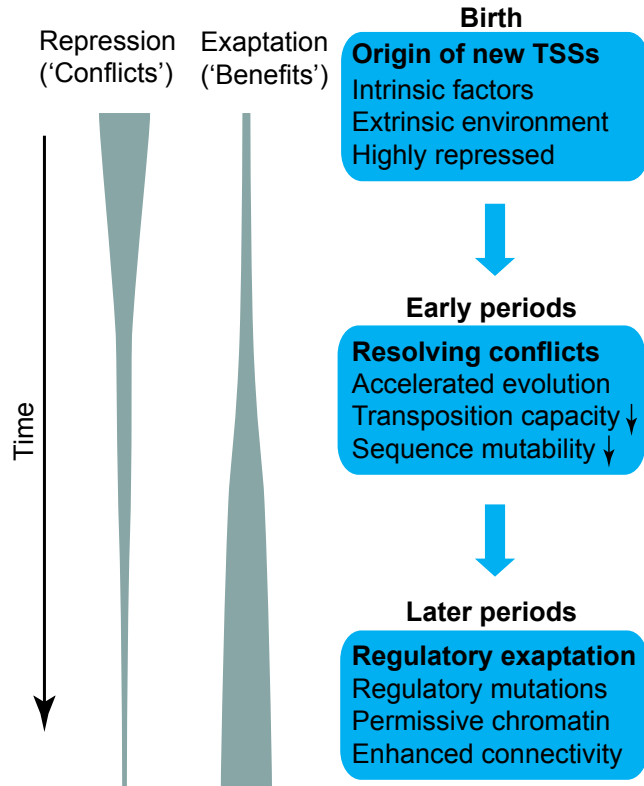

**Intrinsic factors**

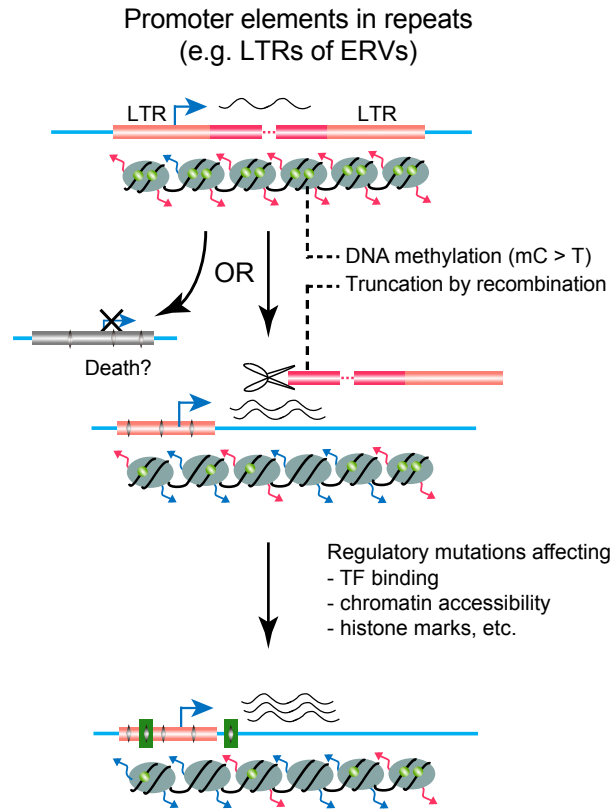

- Young TSS
- Repeat element
- Transcript
- Nucleosome
- DNA methylation
- Repressive histone marks
- Activating histone marks
- Mutations
- Regulatory mutations

**Extrinsic environment**

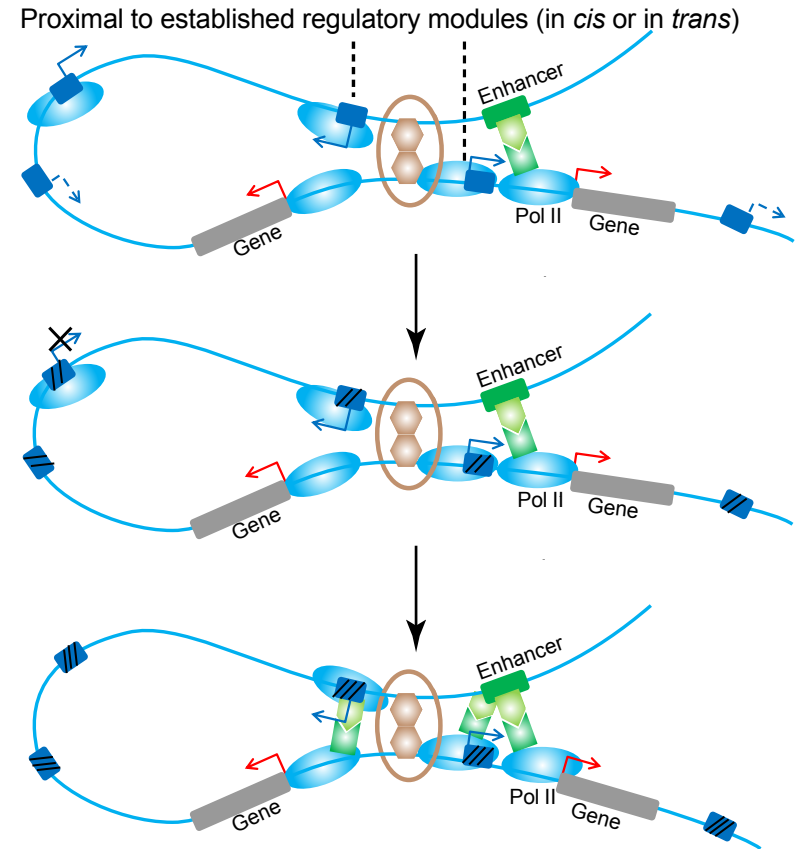

- Repeat element
- Old TSS
- Young TSS
- Unexpressed proto-TSS
- CTCF
- Cohesin
- TFs
- Mutations

## Supplementary Information

### Supplementary Table 1 Species and genome assemblies used for estimating sequence ages of TSSs.

| Species     | Assembly version | Taxa    |                 |          |         |  |
|-------------|------------------|---------|-----------------|----------|---------|--|
| Human       | hg19             | Homnids | Old anthropoids | Primates | Mammals |  |
| Chimp       | panTro4          |         |                 |          |         |  |
| Gorilla     | gorGor3          |         |                 |          |         |  |
| Orangutan   | ponAbe2          |         |                 |          |         |  |
| Gibbon      | nomLeu3          | World   |                 |          |         |  |
| Rhesus      | rheMac3          |         |                 |          |         |  |
| Baboon      | papHam1          |         |                 |          |         |  |
| Marmoset    | calJac3          |         |                 |          |         |  |
| Tarsier     | tarSyr1          |         |                 |          |         |  |
| Mouse lemur | micMur1          |         |                 |          |         |  |
| Bushbaby    | otoGar1          |         |                 |          |         |  |
| Mouse       | mm10             |         |                 |          |         |  |
| Rat         | rn6              |         |                 |          |         |  |
| Pig         | susScr3          |         |                 |          |         |  |
| Cow         | bosTau7          |         |                 |          |         |  |
| Horse       | equCab2          |         |                 |          |         |  |
| Dog         | canFam3          |         |                 |          |         |  |

### Supplementary Table 2 Statistics of grouping results with different sets of cutoffs for liftOver, after filtering the TSSs overlapping blacklist regions.

| Min mapped % of TSS peaks | Min mapped % of TSS peak±100 bp | Min chain size | Mammalian | Primate | OWA   | Hominid | Used in final analyses ? |
|---------------------------|---------------------------------|----------------|-----------|---------|-------|---------|--------------------------|
| 0.9                       | 0.5                             | 10kb           | 141,117   | 6,668   | 3,318 | 799     | Yes                      |
| 0.8                       | 0.5                             | 10kb           | 142,782   | 5,531   | 2,902 | 687     | No                       |
| 0.5                       | 0.5                             | 10kb           | 144,121   | 4,652   | 2,532 | 597     | No                       |
| 0.9                       | 0.3                             | 10kb           | 141,288   | 6,559   | 3,264 | 791     | No                       |
| 0.9                       | 0.7                             | 10kb           | 139,652   | 7,505   | 3,840 | 905     | No                       |
| 0.9                       | 0.5                             | 5kb            | 141,328   | 6,716   | 3,109 | 749     | No                       |
| 0.9                       | 0.5                             | 20kb           | 140,913   | 6,591   | 3,525 | 873     | No                       |

### Supplementary Table 3 Lists of blacklist genomic regions used for filtering TSSs.

| File | Source |
|------|--------|
|------|--------|

|                                              |                         |
|----------------------------------------------|-------------------------|
| wgEncodeDukeMapabilityRegionsExcludable.bed  | ENCODE                  |
| wgEncodeDacMapabilityConsensusExcludable.bed | ENCODE                  |
| seq.cov1.ONHG19.bed                          | Pickrell et al. 2011    |
| UM1K0M50BP.bed                               | Li and Freudenberg 2014 |

**Supplementary Table 4 Statistics of TSS subgroups defined by transcript types and the nearest retrotransposon elements.**

| Mammalian         |        |       | Primate           |        |      | Old World Anthropoid |        |     | Hominid           |        |     |
|-------------------|--------|-------|-------------------|--------|------|----------------------|--------|-----|-------------------|--------|-----|
| mRNA              | SINE   | 3427  | mRNA              | SINE   | 271  | mRNA                 | SINE   | 100 | mRNA              | SINE   | 16  |
|                   | LINE   | 3470  |                   | LINE   | 299  |                      | LINE   | 118 |                   | LINE   | 43  |
|                   | LTR    | 830   |                   | LTR    | 433  |                      | LTR    | 306 |                   | LTR    | 61  |
|                   | Others | 75301 |                   | Others | 1569 |                      | Others | 555 |                   | Others | 145 |
| proximal lncRNA   | SINE   | 2019  | proximal lncRNA   | SINE   | 204  | proximal lncRNA      | SINE   | 89  | proximal lncRNA   | SINE   | 15  |
|                   | LINE   | 2311  |                   | LINE   | 266  |                      | LINE   | 164 |                   | LINE   | 34  |
|                   | LTR    | 827   |                   | LTR    | 465  |                      | LTR    | 309 |                   | LTR    | 67  |
|                   | Others | 35202 |                   | Others | 1071 |                      | Others | 426 |                   | Others | 87  |
| intergenic lncRNA | SINE   | 966   | intergenic lncRNA | SINE   | 84   | intergenic lncRNA    | SINE   | 43  | intergenic lncRNA | SINE   | 8   |
|                   | LINE   | 1232  |                   | LINE   | 219  |                      | LINE   | 173 |                   | LINE   | 53  |
|                   | LTR    | 1192  |                   | LTR    | 799  |                      | LTR    | 524 |                   | LTR    | 146 |
|                   | Others | 9106  |                   | Others | 516  |                      | Others | 269 |                   | Others | 58  |
| other RNA         | SINE   | 324   | other RNA         | SINE   | 32   | other RNA            | SINE   | 11  | other RNA         | SINE   | 0   |
|                   | LINE   | 368   |                   | LINE   | 78   |                      | LINE   | 39  |                   | LINE   | 17  |
|                   | LTR    | 147   |                   | LTR    | 99   |                      | LTR    | 67  |                   | LTR    | 17  |
|                   | Others | 4395  |                   | Others | 263  |                      | Others | 125 |                   | Others | 32  |

**Supplementary Table 5 URL links of main published datasets used in this study.**

|                         | Download links                                                                                                                                                                            |
|-------------------------|-------------------------------------------------------------------------------------------------------------------------------------------------------------------------------------------|
| FANTOM TSSs             | <a href="http://fantom.gsc.riken.jp/5/suppl/Hon_et_al_2016/data/">http://fantom.gsc.riken.jp/5/suppl/Hon_et_al_2016/data/</a>                                                             |
| liftOver chain files    | <a href="http://hgdownload.cse.ucsc.edu/goldenPath/hg19/liftOver/">http://hgdownload.cse.ucsc.edu/goldenPath/hg19/liftOver/</a>                                                           |
| RepeatMasker annotation | <a href="http://www.repeatmasker.org/genomes/hg19/RepeatMasker-rm405-db20140131/hg19.fa.out.gz">http://www.repeatmasker.org/genomes/hg19/RepeatMasker-rm405-db20140131/hg19.fa.out.gz</a> |
| TRF                     | <a href="http://hgdownload.cse.ucsc.edu/goldenpath/hg19/database/simpleRepeat.txt.gz">http://hgdownload.cse.ucsc.edu/goldenpath/hg19/database/simpleRepeat.txt.gz</a>                     |
| STRcat                  | <a href="http://strcat.teamerlich.org/download">http://strcat.teamerlich.org/download</a>                                                                                                 |
| MULTIZ alignments       | <a href="http://hgdownload.cse.ucsc.edu/goldenPath/hg19/multiz100way/maf/">http://hgdownload.cse.ucsc.edu/goldenPath/hg19/multiz100way/maf/</a>                                           |
| Germline methylation    | <a href="https://www.ncbi.nlm.nih.gov/geo/query/acc.cgi?acc=GSE63818">https://www.ncbi.nlm.nih.gov/geo/query/acc.cgi?acc=GSE63818</a>                                                     |
| Variants from           | <a href="ftp://ftp.1000genomes.ebi.ac.uk/vol1/ftp/release/20130502/">ftp://ftp.1000genomes.ebi.ac.uk/vol1/ftp/release/20130502/</a>                                                       |

|                            |                                                                                                                                                                                                                                                                                                                                                                                                                                                                                                                                                                                                                            |
|----------------------------|----------------------------------------------------------------------------------------------------------------------------------------------------------------------------------------------------------------------------------------------------------------------------------------------------------------------------------------------------------------------------------------------------------------------------------------------------------------------------------------------------------------------------------------------------------------------------------------------------------------------------|
| 1000 genomes project       |                                                                                                                                                                                                                                                                                                                                                                                                                                                                                                                                                                                                                            |
| ENCODE functional datasets | <a href="ftp://ftp.ebi.ac.uk/pub/databases/ensembl/encode/integration_data_jan2011/">ftp://ftp.ebi.ac.uk/pub/databases/ensembl/encode/integration_data_jan2011/</a>                                                                                                                                                                                                                                                                                                                                                                                                                                                        |
| ChIA-PET data              | <a href="https://www.ncbi.nlm.nih.gov/geo/query/acc.cgi?acc=GSE62742">https://www.ncbi.nlm.nih.gov/geo/query/acc.cgi?acc=GSE62742</a><br><a href="https://www.ncbi.nlm.nih.gov/geo/query/acc.cgi?acc=GSE72816">https://www.ncbi.nlm.nih.gov/geo/query/acc.cgi?acc=GSE72816</a>                                                                                                                                                                                                                                                                                                                                             |
| AS or QTL data             | <a href="http://www.nature.com/ng/journal/v47/n12/extref/ng.3432-S5.txt">http://www.nature.com/ng/journal/v47/n12/extref/ng.3432-S5.txt</a><br><a href="https://www.nature.com/nature/journal/v523/n7559/extref/nature14465-s2.zip">https://www.nature.com/nature/journal/v523/n7559/extref/nature14465-s2.zip</a><br><a href="http://mitra.stanford.edu/kundaje/portal/chromovar3d/index.html">http://mitra.stanford.edu/kundaje/portal/chromovar3d/index.html</a><br><a href="http://www.cell.com/cms/attachment/2062331538/2064077614/mmc2.xlsx">http://www.cell.com/cms/attachment/2062331538/2064077614/mmc2.xlsx</a> |

**Supplementary Table 6 A table containing the defined TSS groups/subgroups used in analyses (in a separate file).**

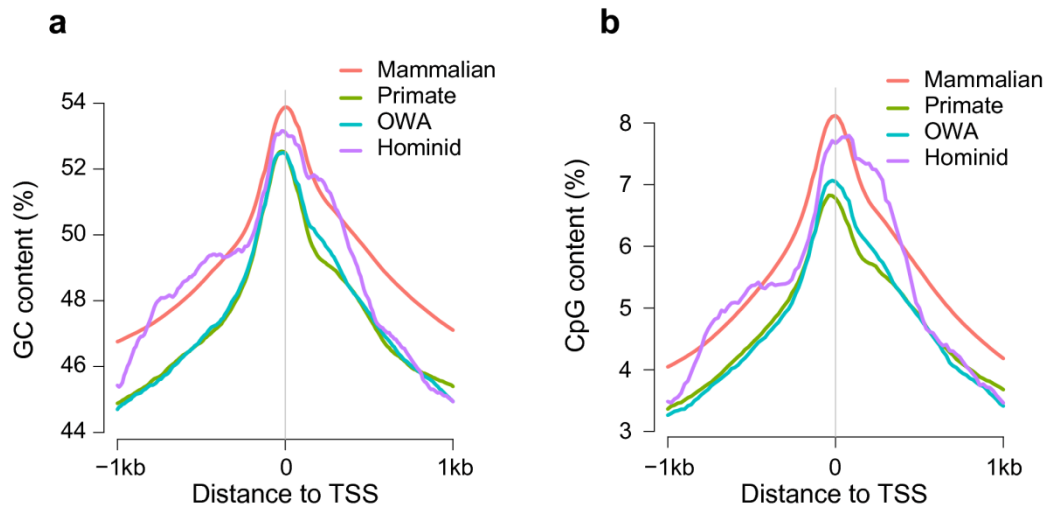

**Supplementary Figure 1 Comparison of GC content and CpG content between four groups.**



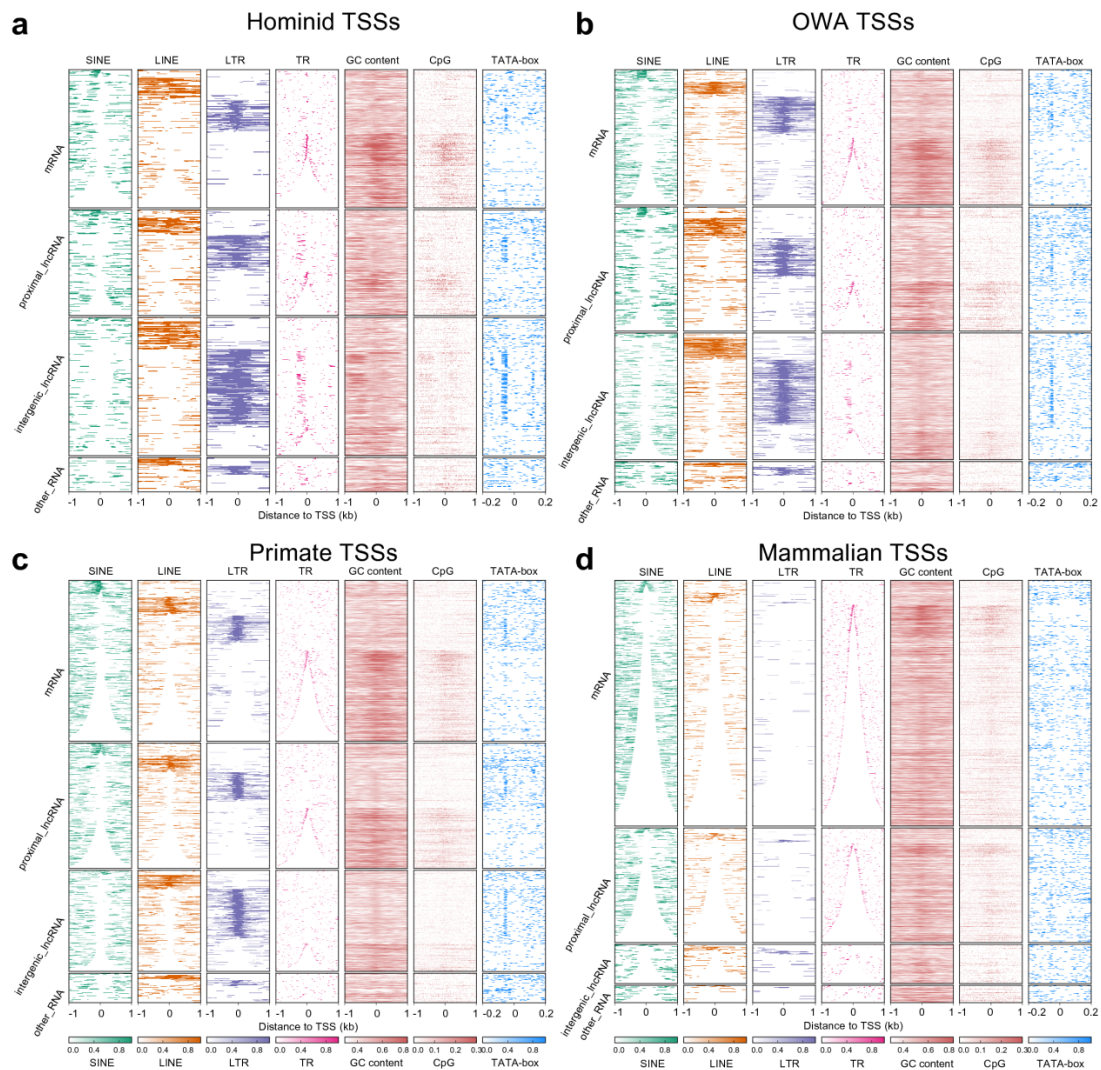

**Supplementary Figure 2 Heatmap for repeat content, GC content, CpG content and TATA-box in four TSS groups.** Each TSS group is subdivided into subgroups based on transcript type. Within each subgroup, rows are sorted by the distance from the TSS to the nearest TE element (priority order: SINE > LINE > LTR > Others). For the TSSs in the ‘Others’ category, rows are sorted based on their distances to the nearest tandem repeat elements. The color gradients for repeat elements (SINE, LINE, LTR, tandem repeat (TR)) represent the repeat coverage in 10 bp bins. Regions shown in the TATA-box columns are TSS±200 bp. Because of the large number of TSSs in the ‘mammalian’ group (panel **d**), only the data of 5000 randomly selected TSSs are shown.

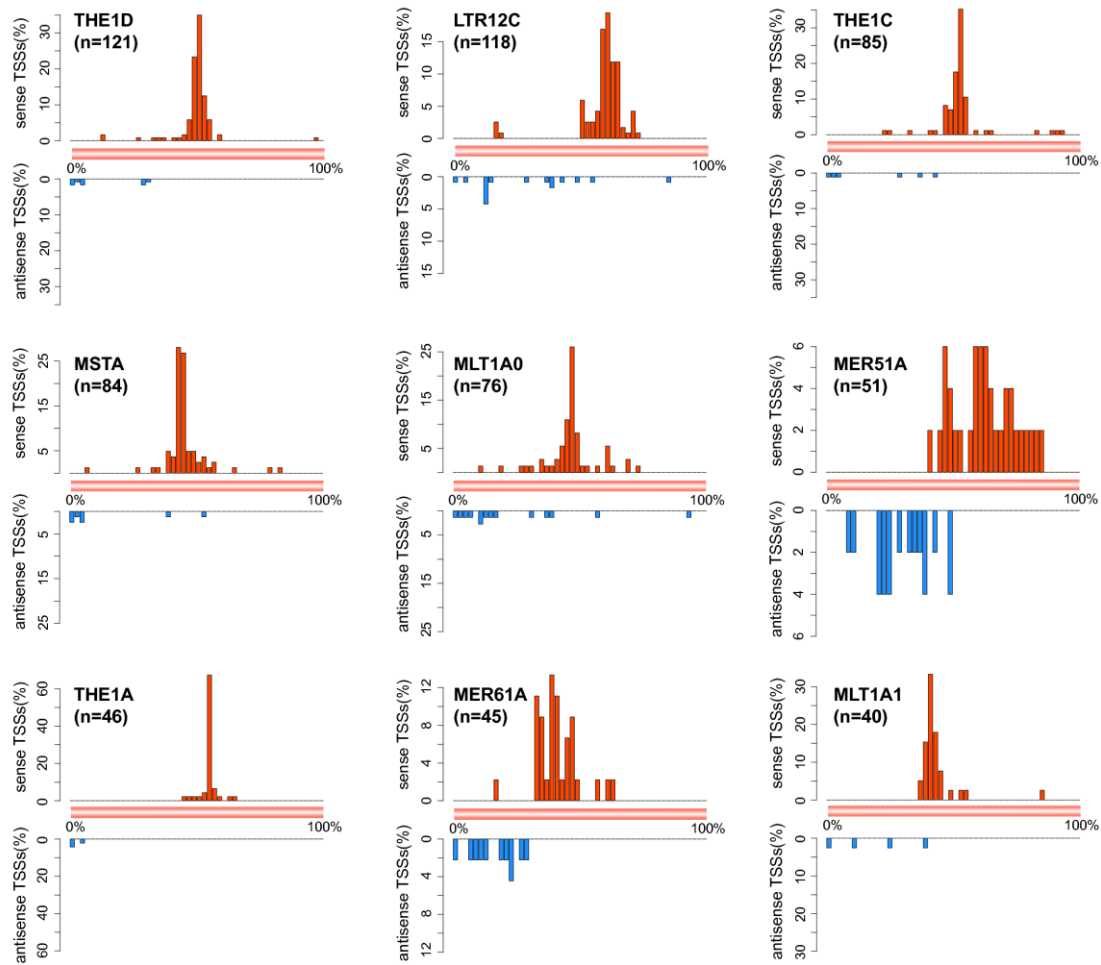

**Supplementary Figure 3 Distribution of young TSSs along LTR subfamilies.** These nine subfamilies are among the top 10 LTR subfamilies which harbor most young TSSs. The tenth, THEIB, has already been shown in **Fig. 2b**. Number of young TSSs for each subfamily is given in the bracket.

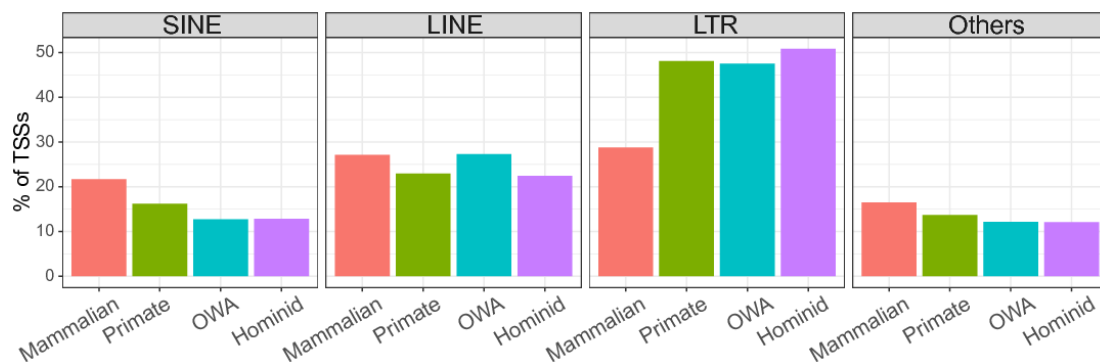

**Supplementary Figure 4 Percentages of TSSs associated with different retrotransposons which contain a TATA-box motif starting at 25-35 bp upstream regions of the dominant TSSs.**

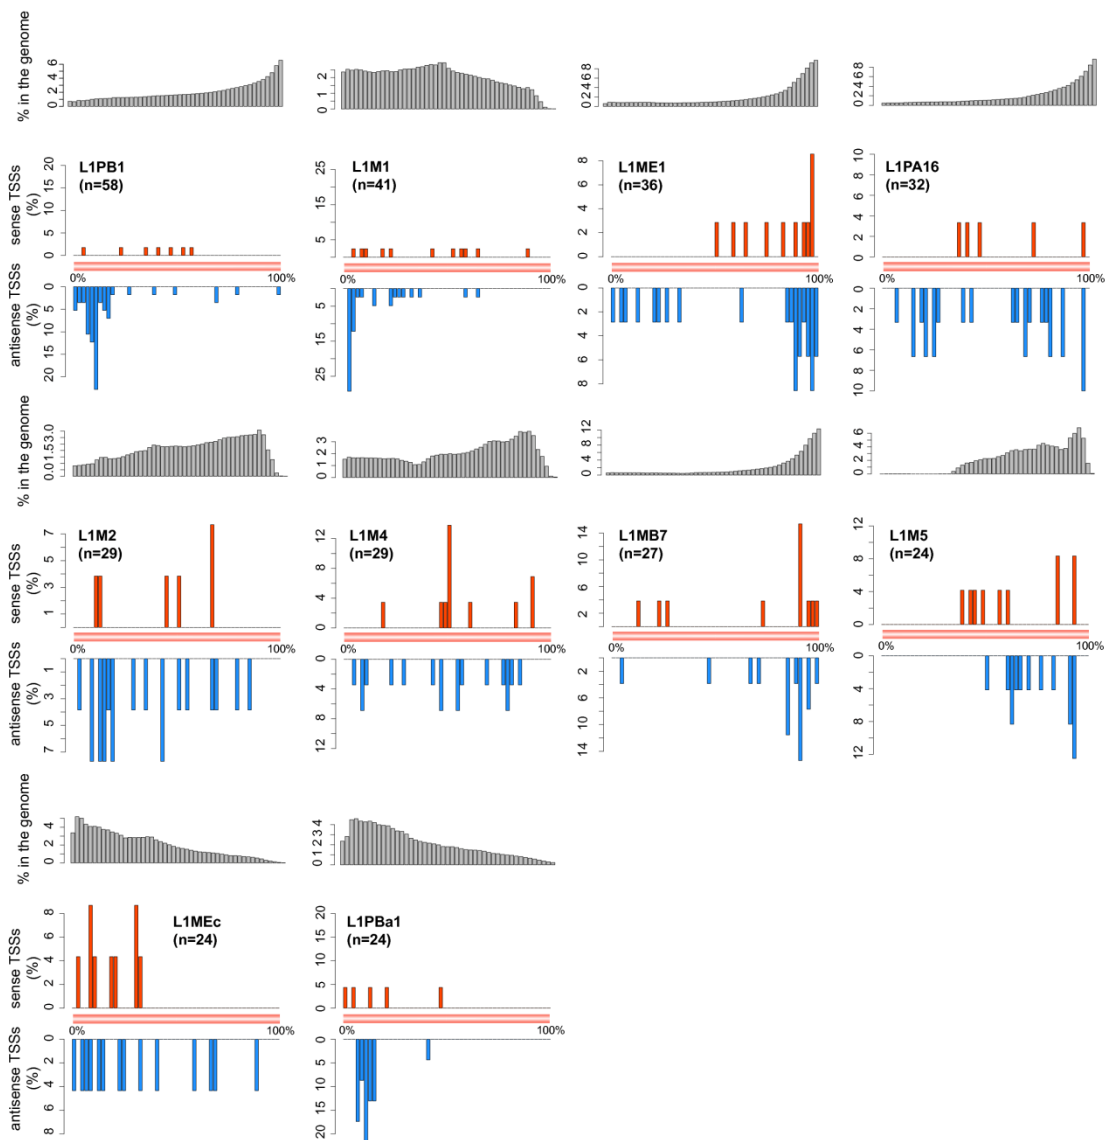

**Supplementary Figure 5 Distribution of young TSSs along L1 subfamilies.** The top 10 L1 subfamilies, which harbor most young TSSs, show considerable heterogeneity regarding the positions of young TSSs within the consensus sequences. The gray barplots are background positional distributions of sequences from the corresponding subfamilies in the human genome. Number of young TSSs for each subfamily is given in the bracket.

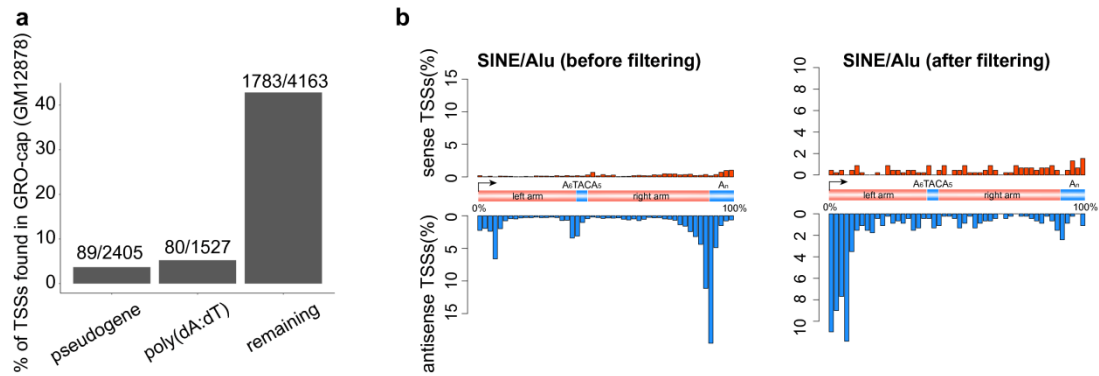

**Supplementary Figure 6 Putative false positives associated with pseudogenes and poly(dA:dT) tracts in FANTOM 5 TSSs.** (a) Percentages of FANTOM 5 TSSs of GM12878 found in GRO-cap defined TSSs of GM12878 (from Core et al. 2014), based on the FANTOM TSSs found only in primate lineages. A FANTOM TSS is considered to be found in the GRO-cap dataset if it is within 100 bp of a GRO-cap TSS. (b) Distribution of FANTOM 5 TSSs along the Alu consensus element before and after filtering the suspicious TSSs.

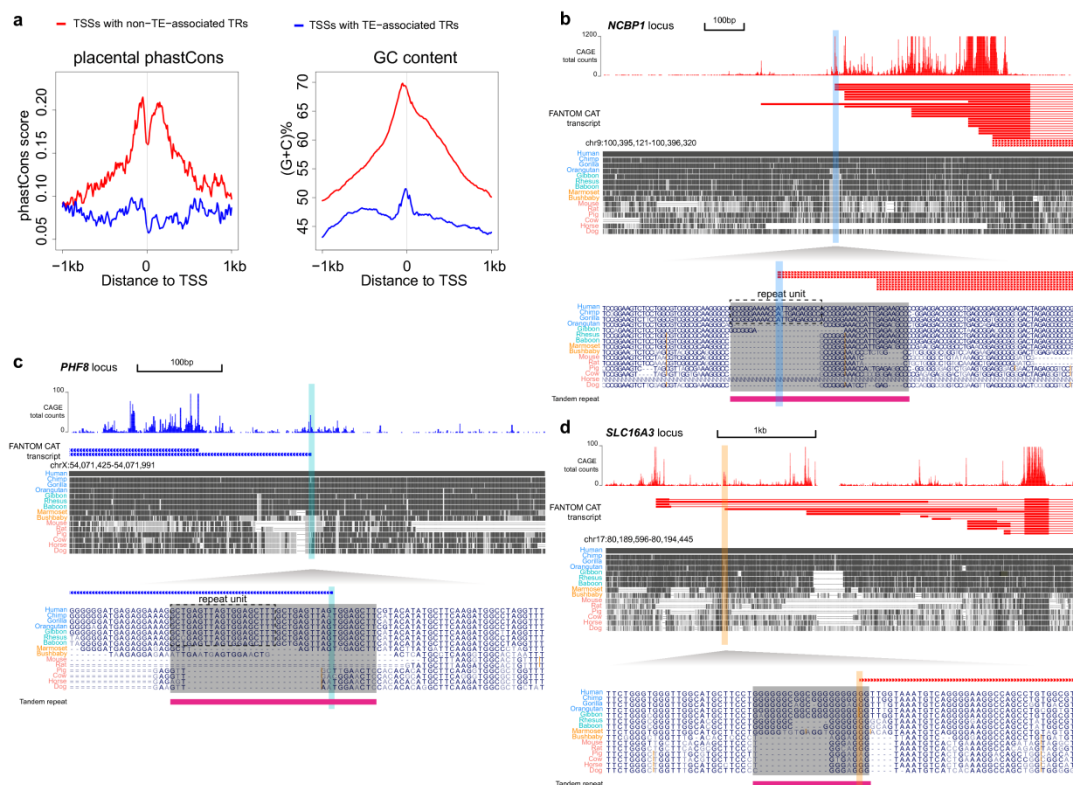

**Supplementary Figure 7 TSSs associated with tandem repeats (TRs) but not associated with TEs.** (a) Comparison of TSSs with non-TE-associated TRs and TSSs with TE-associated TRs regarding sequence conservation scores among placental mammals and GC content. (b-d) Examples of non-TE-associated TR expansions which contribute to new TSSs in (b) 'hominid', (c) 'OWA' and (d) 'primate' groups respectively. In each panel, at the top are the CAGE total tag counts and transcripts from FANTOM (red, forward strand; blue, reverse strand) and genomic alignment

blocks from UCSC genome browser; at the bottom is the enlarged region of the young TSS, with grey shade indicating the TR expansion.

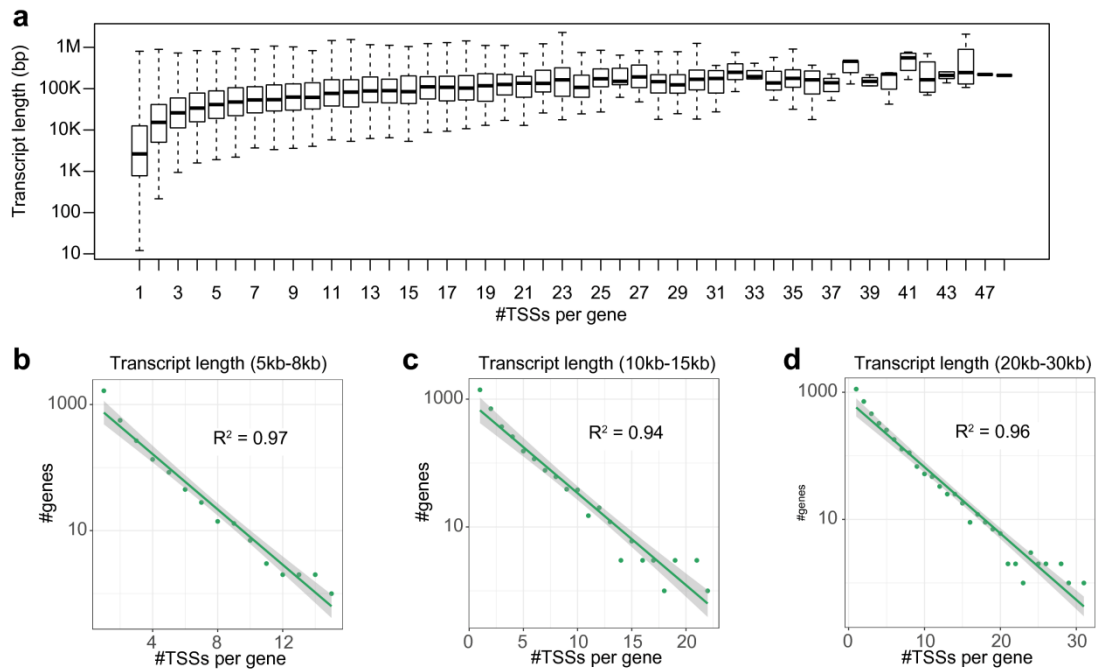

**Supplementary Figure 8 The exponential relationship between number of genes with a specific number of TSSs and number of TSSs per gene is independent of the gene lengths.** (a) Boxplots of transcript lengths for genes with different numbers of TSSs. For each gene, we used the length of its longest transcript. Although genes that have more TSSs tend to have longer transcripts, there are also many long genes that have small numbers of TSSs. Inspecting genes within specific length ranges (panels b-d), still reveals a clear exponential relationship.  $R^2$  is the coefficient of determination for the linear regression in the figure.

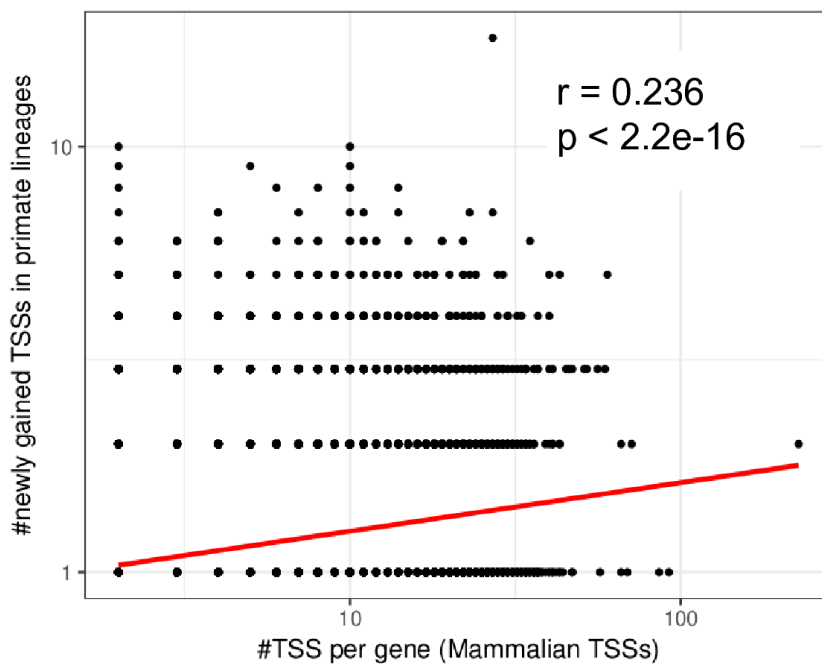

**Supplementary Figure 9 Relationship between the number of old ('mammalian') TSSs per gene and the number of newly gained TSSs in primate lineages, on a log<sub>10</sub> scale. The red line is derived from linear regression based on the data points. Pearson's r and the corresponding p-value are also shown in the figure.**

**a Deletions**

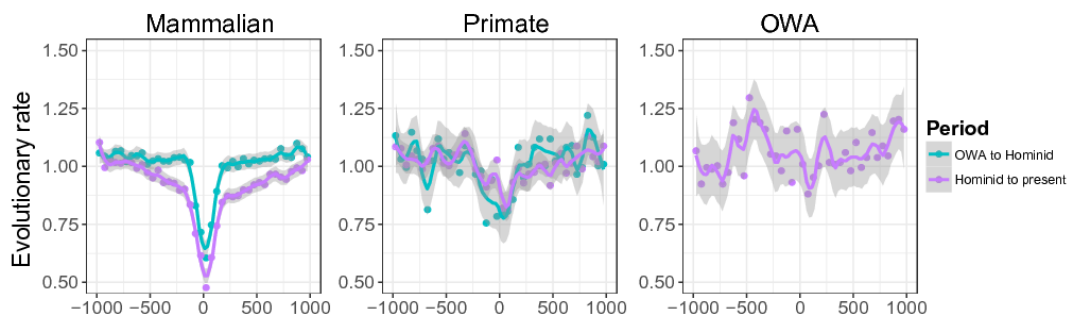

**b Insertions**

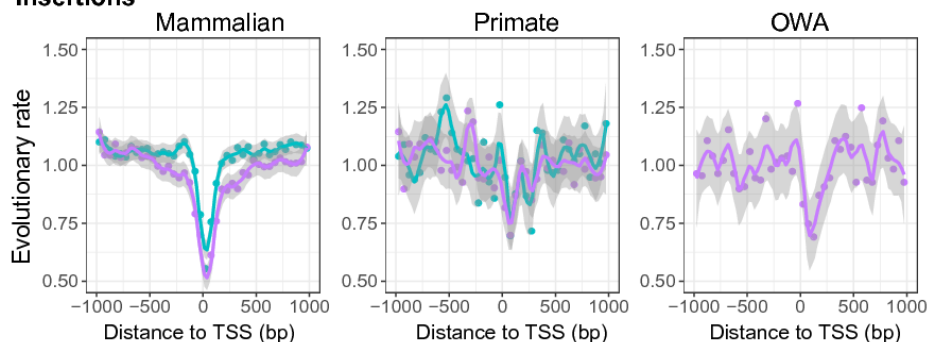

**Supplementary Figure 10 Relative deletion and insertion rates (normalized by genomic average) inferred from genomic alignments for three TSS groups. Average rate were calculated for 40 bins along TSS±1kb. We estimated**



insertion/deletion rates of two periods for ‘mammalian’ and ‘primate’ groups, but only one for the ‘OWA’ group so as to focus on the evolutionary rates after TSS loci emerged in the genome. Fitting curves were estimated by ‘loess’ method.

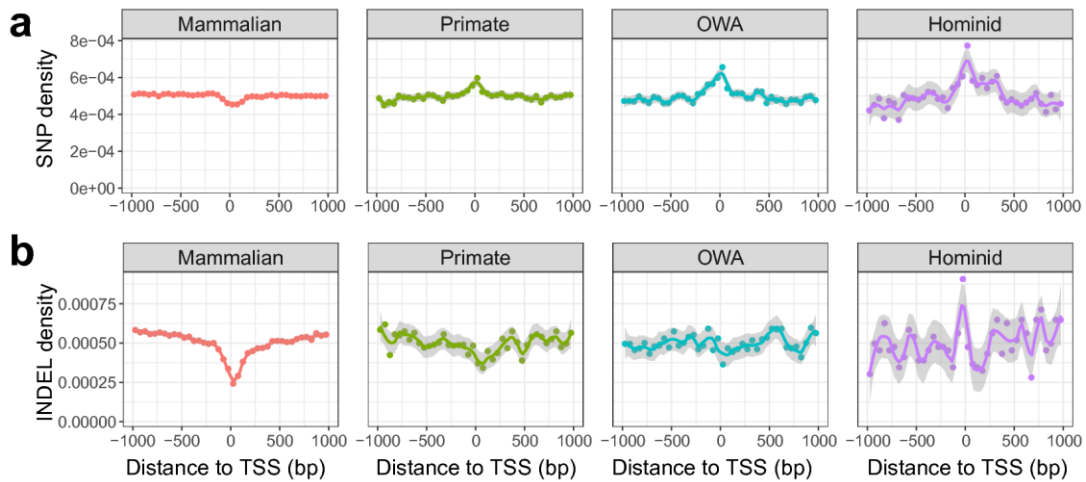

**Supplementary Figure 11 Single nucleotide polymorphism (SNP, panel a) and insertion/deletion (INDEL, panel b) densities around TSSs (40 bins along TSS±1kb), based on variants of the 1000 genomes project phase 3 release. Only the biallelic variants with a minor allele frequency of  $\geq 0.01$  were considered. Because the genotype files in 1000 genomes project lack the ancestral allele information for insertion/deletion variants, the insertion and deletion variants were merged together for this analysis. Fitting curves were estimated by the ‘loess’ method.**

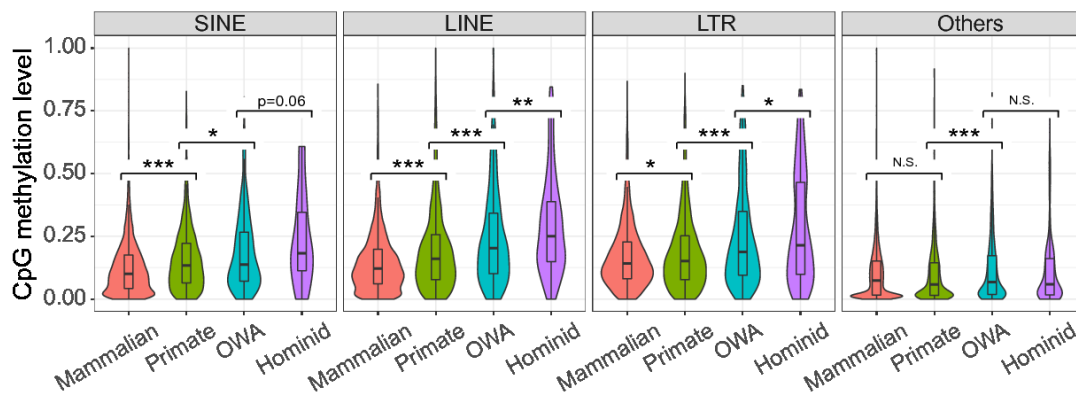

**Supplementary Figure 12 DNA methylation in TSS loci in the germline.** Violin and box plots for germline CpG methylation levels (data from Guo et al. 2015) in different TSS subgroups defined by the types of associated retrotransposons. For each TSS, average methylation level of CpGs in the 2 kb around the TSS was calculated. The TSSs in the “Others” group are mostly non-TE-associated TSSs, except for a few that are associated with DNA transposons. Statistical significance was calculated using the one tailed Wilcoxon rank sum test (“\*”,  $p < 0.05$ ; “\*\*”,  $p < 0.01$ ; “\*\*\*”,  $p < 0.001$ ; N.S., not significant).

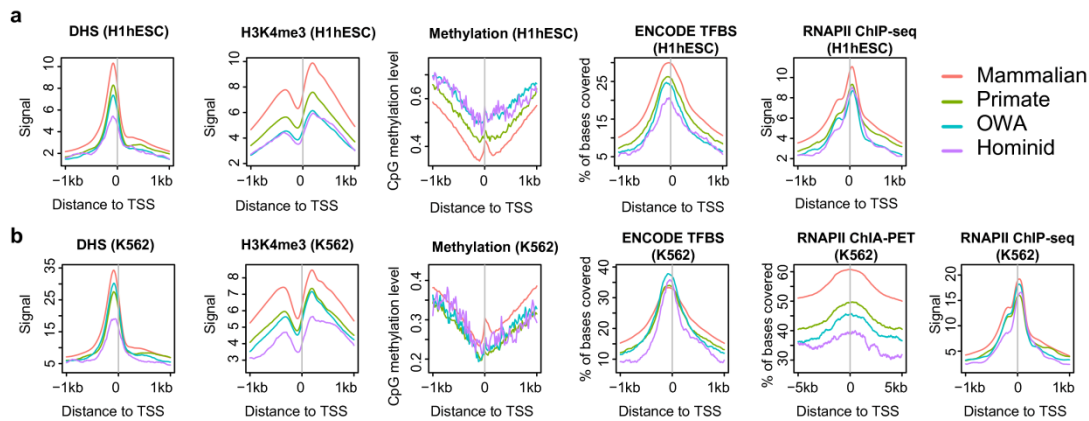

**Supplementary Figure 13 (a)** Meta-profiles of functional signatures in H1-hESC cell line in different TSS groups. **(b)** Meta-profiles of functional signatures in K562 cell line in different TSS groups. Global hypomethylation in the K562 cell line has been previously reported, so the similar pattern of DNA methylation meta-profiles in K562 across TSS groups is not surprising. For the TFBS analysis, we merged the called peaks of TF ChIP-seq datasets and calculated how many bases around TSSs are covered by the peaks. The figure for RNAP II ChIA-PET in H1-hESC is missing because of lack of publicly available data.

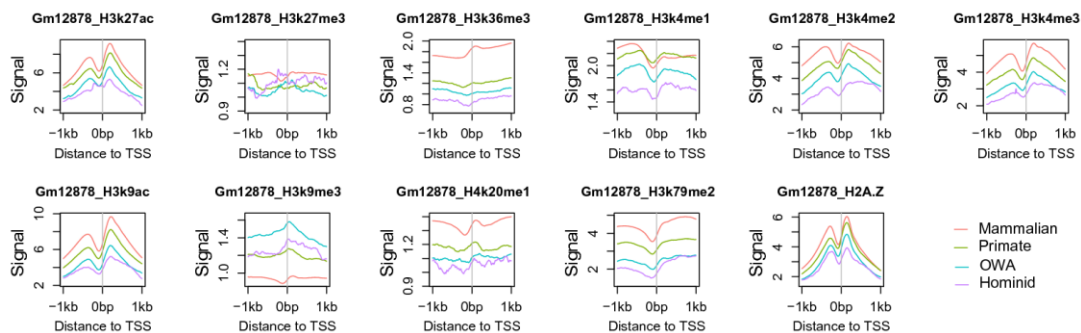

**Supplementary Figure 14** Meta-profiles for histone modifications in GM12878, supplementary to that shown in Fig. 4. All the data was obtained from ENCODE project.

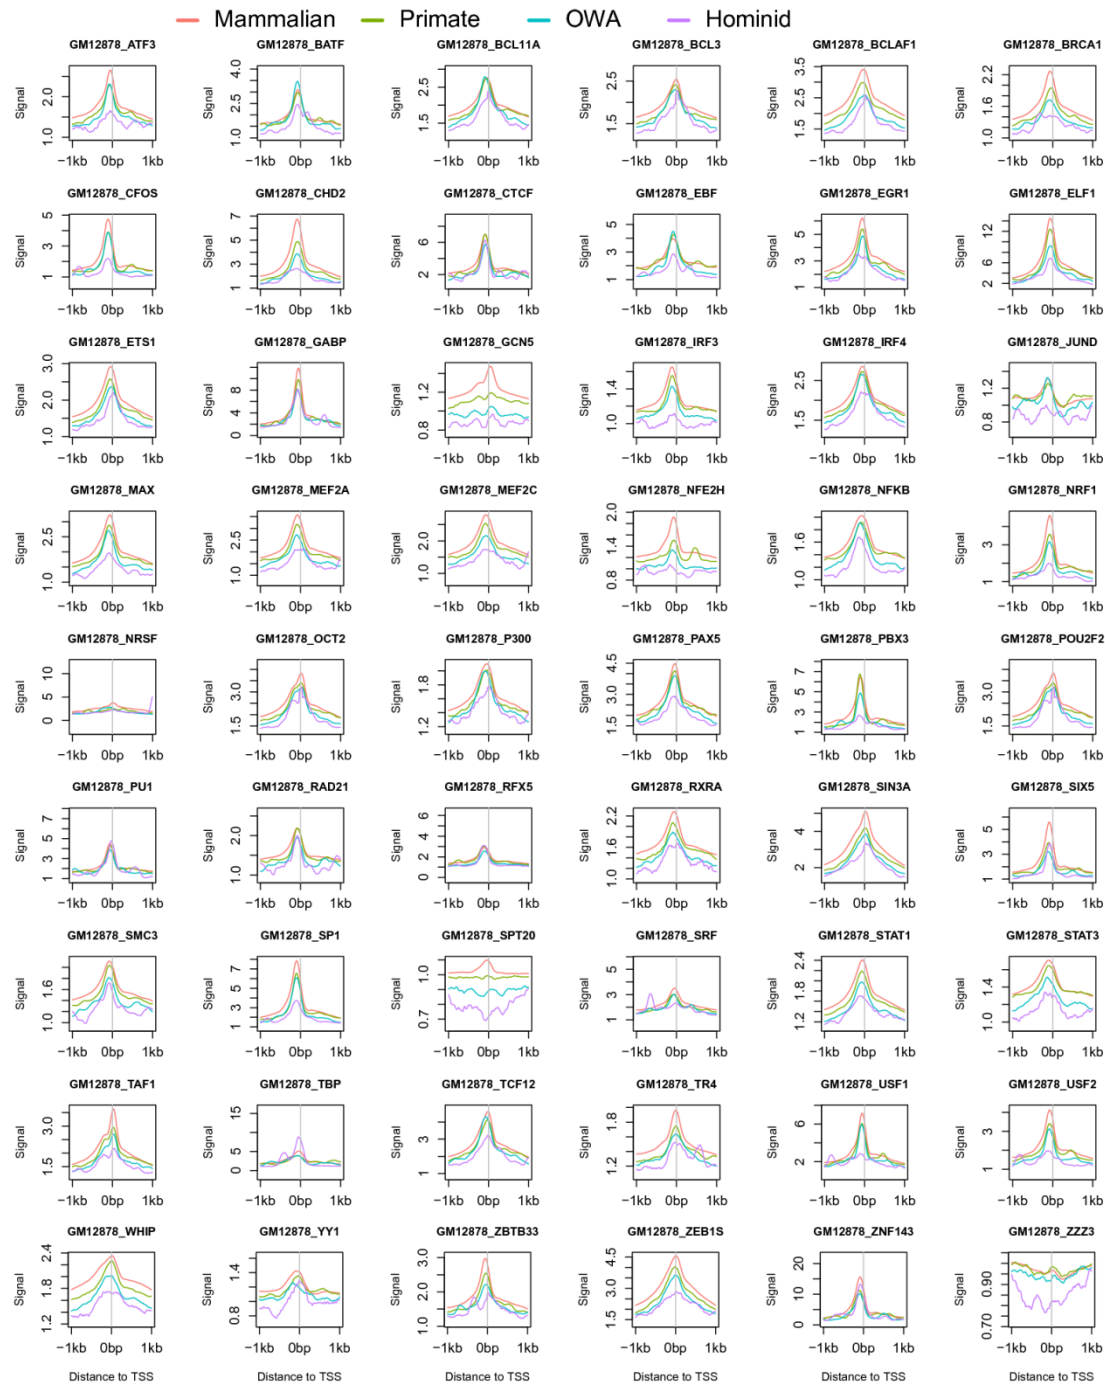

**Supplementary Figure 15 Meta-profiles for TF ChIP-seq signals in GM12878 cell line in different TSS groups. All the data was obtained from ENCODE project.**

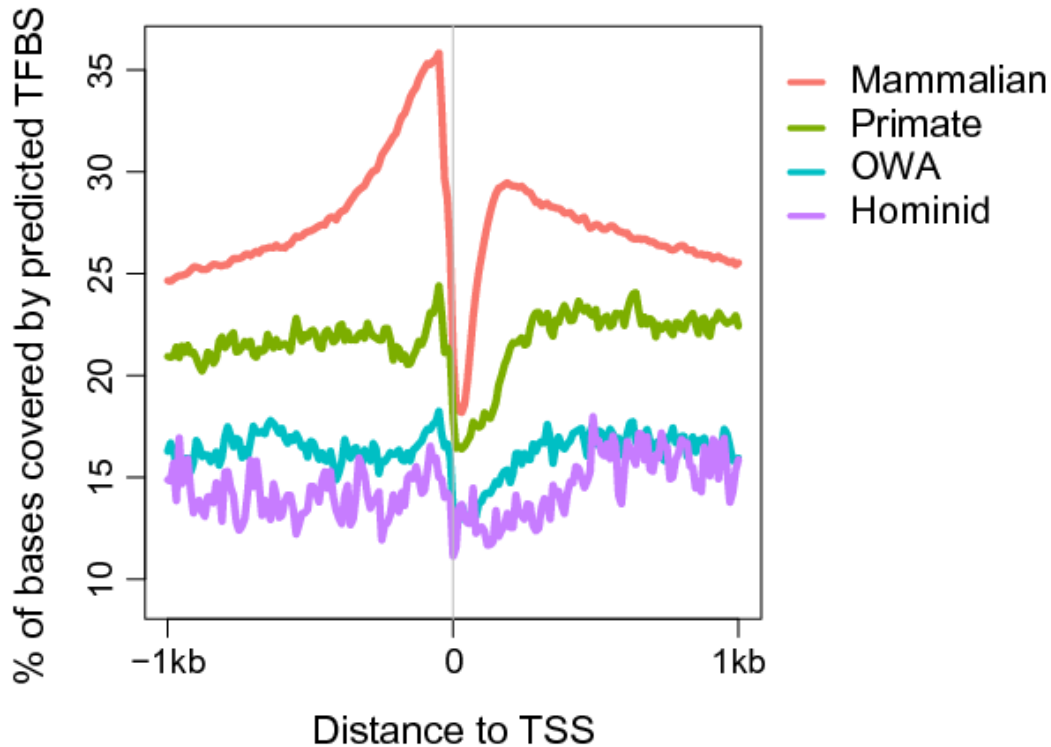

**Supplementary Figure 16 Comparison of the coverage by computationally predicted TFBSs between four TSS groups.** The computationally predicted TFBSs in human genome were from ENCODE project (<http://compbio.mit.edu/encode-motifs/>). Note that the TFBSs predicted by computational methods are based on binding motifs, usually smaller than the called peaks in the TF ChIP-seq data that were used for generating Fig. 4.

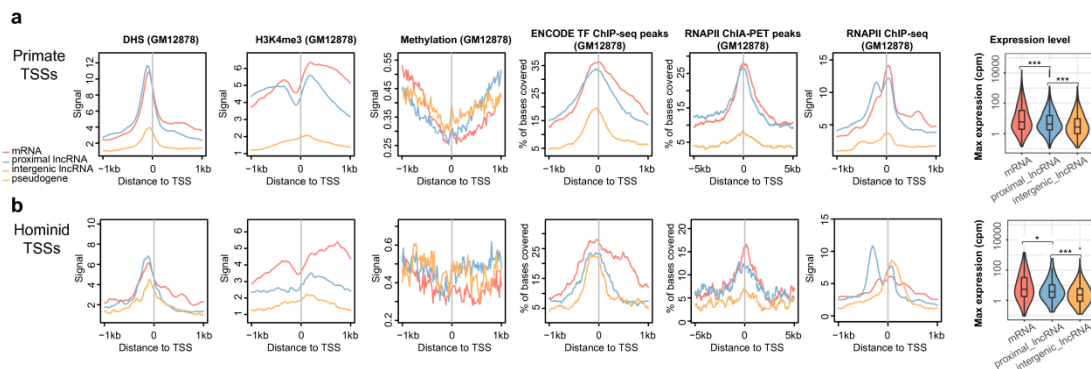

**Supplementary Figure 17 Meta-profiles of functional signatures in GM12878 cell line for different TSS subgroups, defined by transcript types. (a)** For ‘primate’ TSS subgroups. **(b)** For ‘hominid’ TSS subgroups. Statistical significance was calculated using the one-tailed Wilcoxon rank sum tests (“\*”,  $p < 0.05$ ; “\*\*”,  $p < 0.01$ ; “\*\*\*”,  $p < 0.001$ ).

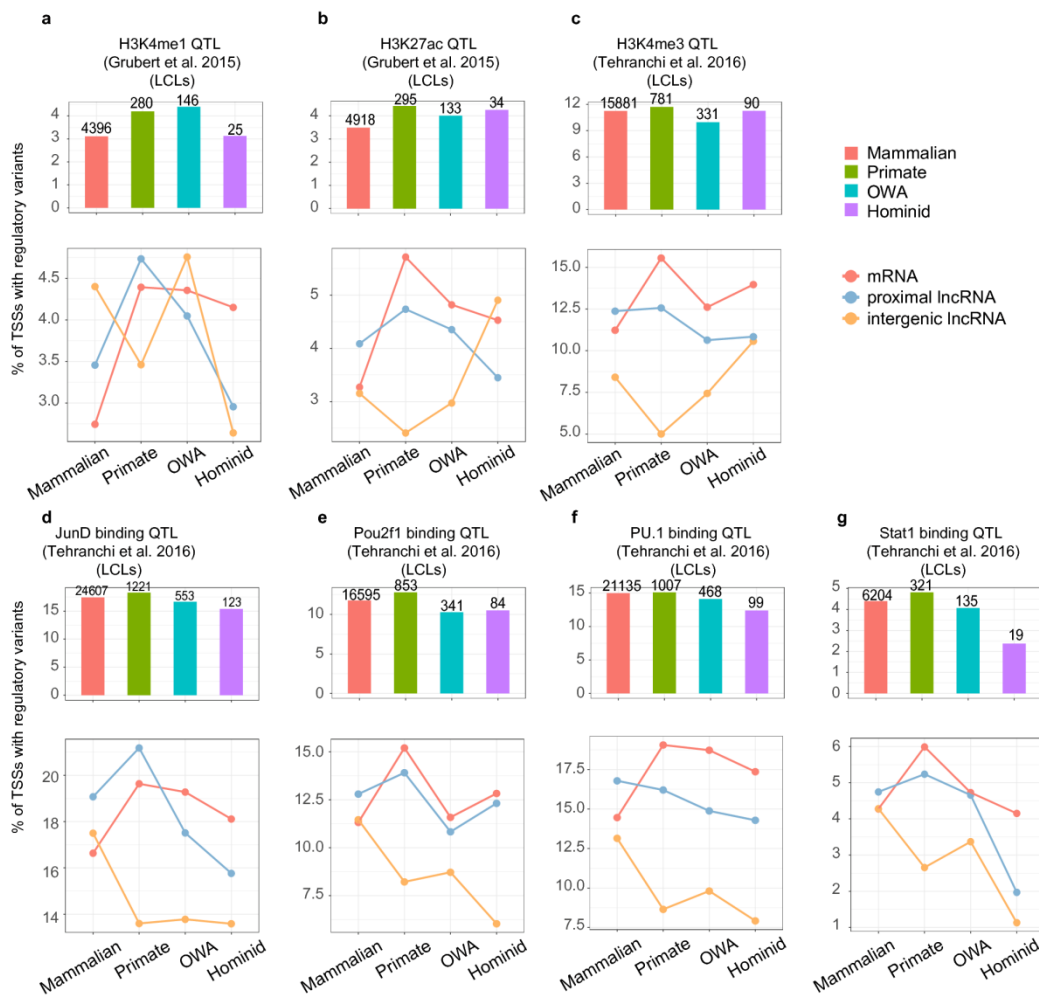

**Supplementary Figure 18 Proportions of TSSs harboring regulatory variants within TSS±1kb in different TSS groups in additional datasets.** The results in this figure were based on regulatory variants with derived allele frequency (DAF)  $\geq 0.01$ . Above the bars are the numbers of TSSs with regulatory variants. Note that for the H3K4me3 QTL dataset from Grubert et al. (2015), the numbers of regulatory variants found in the TSS groups/subgroups are very small, so the trends shown in the panels a-b for different transcript types may not accurately reflect actual trends. LCLs, lymphoblastoid cell lines.

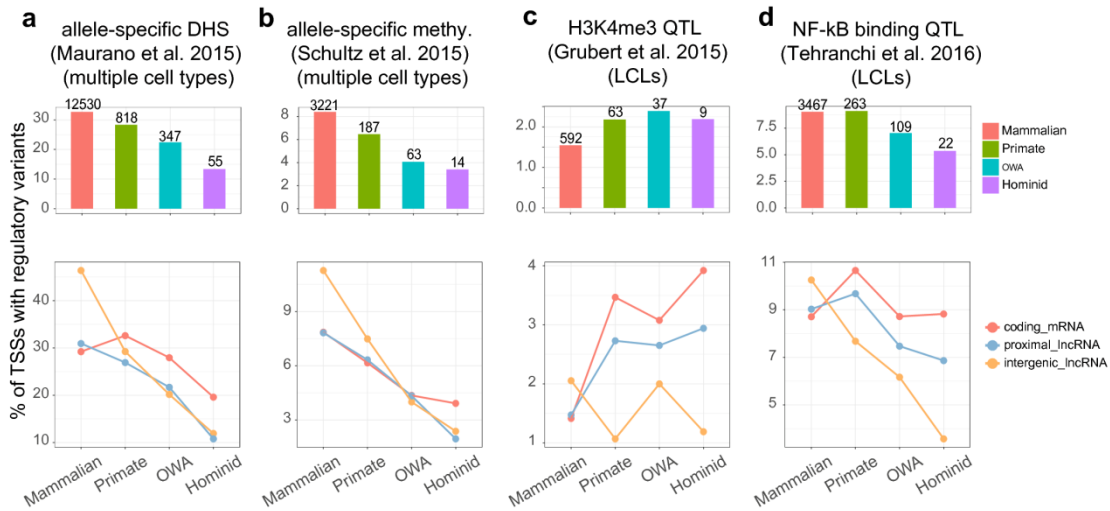

**Supplementary Figure 19 Proportions of TSSs harboring regulatory variants within TSS±1kb in different TSS groups excluding the TSSs separated by < 2 kb.** The shown results are based on variants with  $DAF \geq 0.01$ . Above the bars are the numbers of TSSs with regulatory variants. Note that for the H3K4me3 QTL dataset from Grubert et al. (2015), the numbers of regulatory variants found in the TSS groups/subgroups are very small, so the changing trends shown in the panel c for different transcript types may not accurately reflect actual trends. LCLs, lymphoblastoid cell lines.

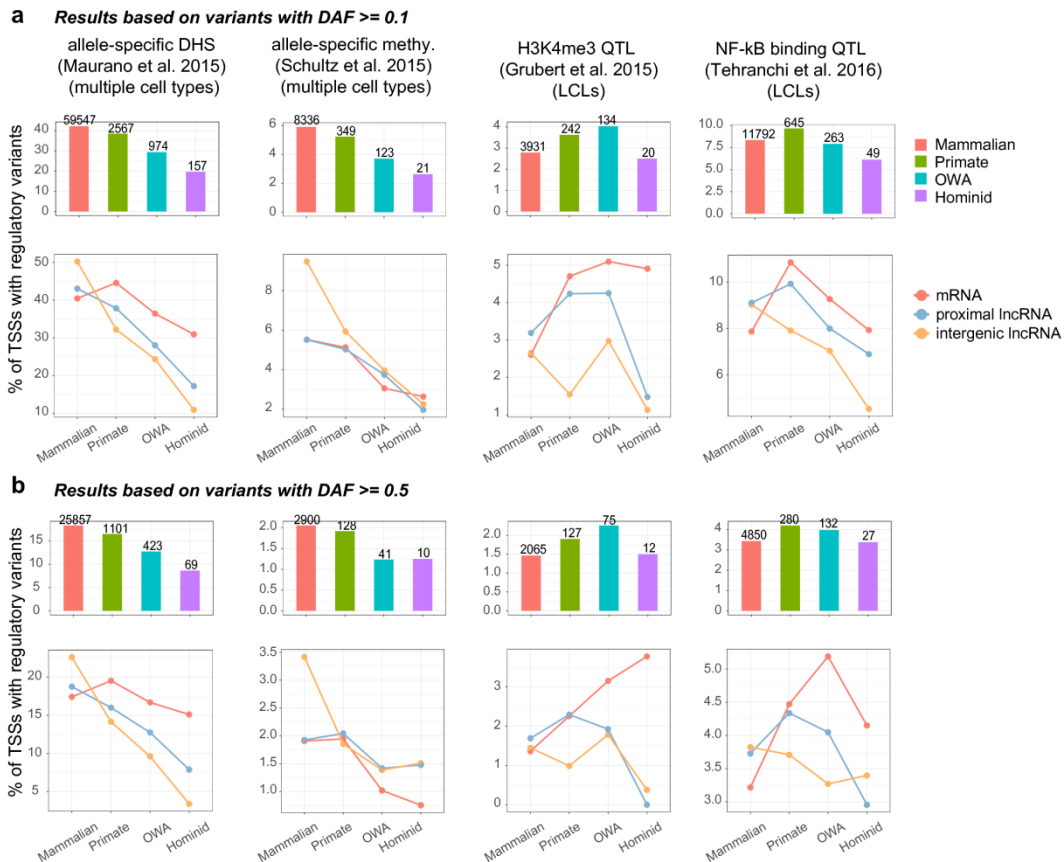

**Supplementary Figure 20 Proportions of TSSs harboring regulatory variants within TSS±1kb in different TSS groups, based on variants with higher**



**thresholds of derived allele frequency (DAF).** (a) Results based on variants with  $DAF \geq 0.1$ . (b) Results based on variants with  $DAF \geq 0.5$ . Above the bars are the numbers of TSSs with regulatory variants. Note that for the results based on variants with  $DAF \geq 0.5$ , the numbers of regulatory variants found in the TSS groups/subgroups are very small, so the changing trends shown in the some panels for different transcript types may not accurately reflect actual trends. LCLs, lymphoblastoid cell lines.

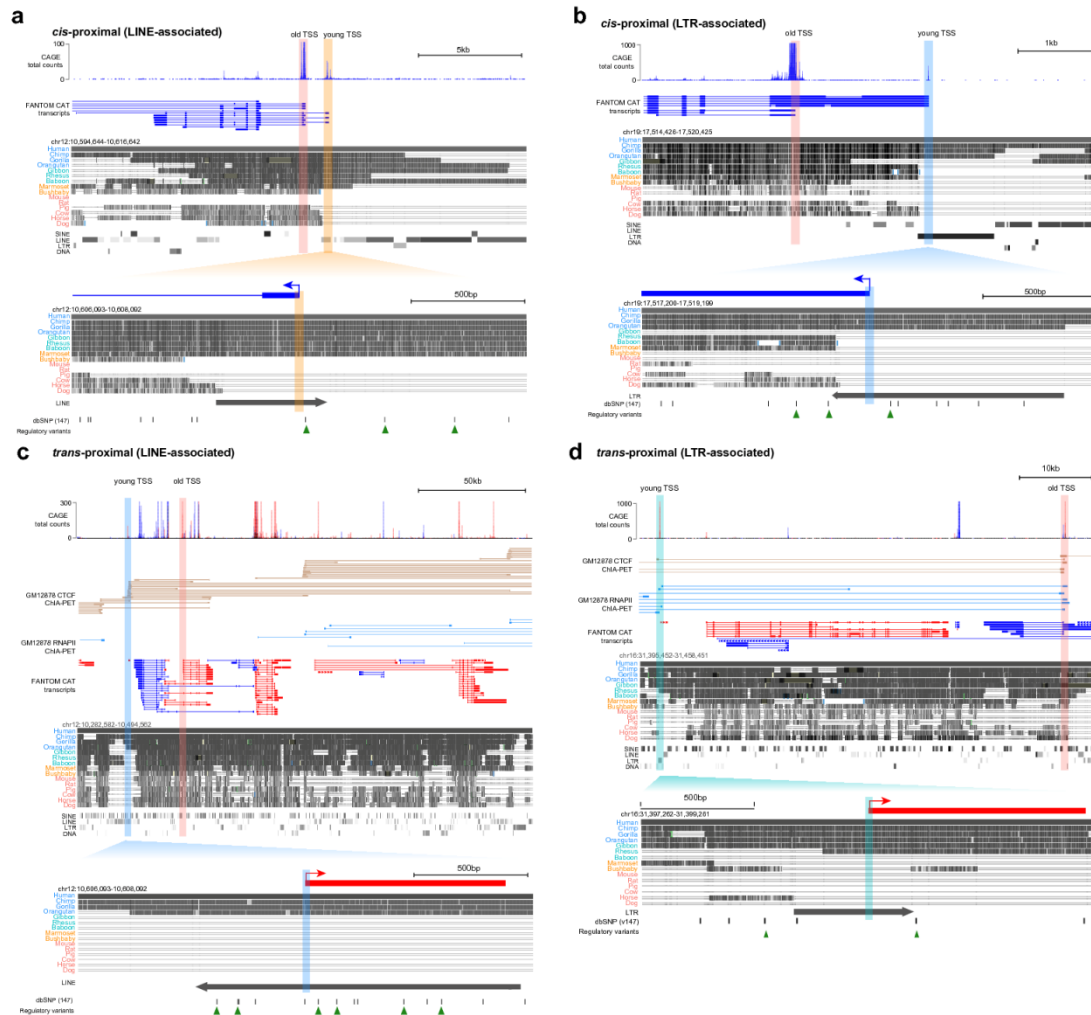

**Supplementary Figure 21 Additional examples for *cis*-proximal and *trans*-proximal young TSSs.** In each panel, from top to bottom: 1) CAGE total tag counts from FANTOM; 2) CTCF and RNAP II ChIA-PET interactions (only for *trans*-proximal examples); 3) FANTOM CAT transcript models, red for forward-strand and blue for reverse-strand transcripts; 4) genome alignments represented by grey blocks and transposable elements within this region, generated from UCSC genome browser; 5) the enlarged region of the young TSS. The old and young TSSs are indicated with shades of different colors (red, “mammalian”; green, “primate”; cyan, “OWA”; blue, “hominid”). The positions of regulatory variants are shown with small triangles in the enlarged figures.
